1           **Macrophages promote endothelial-to-mesenchymal transition via MT1-**  
2                           **MMP/TGF $\beta$ 1 after myocardial infarction**

3                           **Running title: Macrophages and post-MI EndMT**

4    Laura Alonso-Herranz<sup>1</sup>, Álvaro Sahún-Español<sup>2</sup>, Pilar Gonzalo<sup>2</sup>, Polyxeni Gkontra<sup>2</sup>, Vanessa  
5    Núñez<sup>1</sup>, Marta Cedenilla<sup>1</sup>, María Villalba-Orero<sup>1</sup>, Javier Inserte<sup>3,4</sup>, Cristina Clemente<sup>2</sup>, David  
6    García-Dorado<sup>3,4</sup>, Alicia G Arroyo<sup>5\*</sup>, and Mercedes Ricote<sup>1,6,\*</sup>

7    <sup>1</sup>Myocardial Pathophysiology Area, Centro Nacional de Investigaciones Cardiovasculares  
8    Carlos III (CNIC), 28029, Madrid, Spain

9    <sup>2</sup>Vascular Pathophysiology Area, Centro Nacional de Investigaciones Cardiovasculares  
10    Carlos III (CNIC), 28029, Madrid, Spain

11   <sup>3</sup>Cardiovascular Diseases Research Group, Vall d'Hebron University Hospital and Research  
12    Institute (VHIR), 08035, Barcelona, Spain

13   <sup>4</sup>CIBER de Enfermedades Cardiovasculares (CIBERCV), 28029, Madrid, Spain

14   <sup>5</sup>Centro de Investigaciones Biológicas Margarita Salas (CIB-CSIC), 28040, Madrid, Spain

15   <sup>6</sup>Lead contact: Mercedes Ricote ([mricote@cnic.es](mailto:mricote@cnic.es))

16   \*Corresponding authors: Alicia G Arroyo ([agarroyo@cib.csic.es](mailto:agarroyo@cib.csic.es), [+34 91 8373112 Ext. 4309](tel:+34918373112))  
17   and Mercedes Ricote ([mricote@cnic.es](mailto:mricote@cnic.es), [+34 914531200 Ext. 3306](tel:+34914531200))

## 18 ABSTRACT

19 Macrophages produce factors that participate in cardiac repair and remodeling after  
20 myocardial infarction (MI); however, how these factors crosstalk with other cell types mediating  
21 repair is not fully understood. In this study, we demonstrated that cardiac macrophages  
22 increased expression of *Mmp14* (MT1-MMP) 7 days post-MI. Specific macrophage-targeting  
23 of MT1-MMP (MT1-MMP<sup>ΔLysM</sup> mice) attenuates post-MI cardiac dysfunction, reduces fibrosis,  
24 and preserves the cardiac capillary network. Mechanistically, we showed that MT1-MMP  
25 activates latent TGFβ1 in macrophages, leading to paracrine SMAD2-mediated signaling in  
26 endothelial cells and endothelial-to-mesenchymal transition (EndMT). Post-MI MT1-MMP<sup>ΔLysM</sup>  
27 hearts contained fewer cells undergoing EndMT than their wild-type counterparts, and MT1-  
28 MMP-deficient macrophages showed a reduced ability to induce EndMT in co-cultures with  
29 endothelial cells. Our results demonstrate the contribution of EndMT to cardiac fibrosis and  
30 adverse remodeling post-MI and identify macrophage MT1-MMP as a key regulator of this  
31 process. The identified mechanism has potential as a therapeutic target in ischemic heart  
32 disease.

## 33 INTRODUCTION

34 Although the mortality rate from cardiovascular disease (CVD) has declined over the  
35 last 50 years, myocardial infarction (MI) continues to be one of the most lethal diseases  
36 worldwide, and many pathologies arise from adverse remodeling after cardiac injury (eg, heart  
37 failure and cardiac rupture) (Benjamin et al., 2017). Therefore, new strategies are urgently  
38 needed to improve cardiac repair and function after MI. MI is usually provoked by plaque  
39 rupture in a coronary artery, resulting in insufficient oxygen supply to the myocardium, which  
40 undergoes necrosis. The onset of MI triggers a cascade of events, including cardiomyocyte  
41 death, acute inflammation, angiogenesis, and scar formation (Frangogiannis, 2015). Cardiac  
42 healing is impaired by both excessive and insufficient expansion of macrophages (Mφs),  
43 prompting interest in the potential of Mφs as therapeutic targets for CVD (Dick et al., 2019;  
44 Panizzi et al., 2010; van Amerongen et al., 2007). Nonetheless, the exact Mφ phenotypes and  
45 mechanisms that might enhance tissue repair are not clearly defined.

46 We and others have shown that post-injury Mφs are distinct from resident cardiac Mφs  
47 (Bajpai et al., 2019; Dick et al., 2019; Walter et al., 2018). Monocytes and Mφs are sequentially  
48 mobilized from bone marrow (BM) and spleen to the infarcted myocardium (Nahrendorf et al.,  
49 2007; Swirski et al., 2009). During day 1 to day 4 after injury, Ly6C<sup>high</sup> inflammatory Mφs clear  
50 necrotic cellular debris and damaged extracellular matrix (ECM) from the tissue and attract  
51 other immune cells through the secretion of pro-inflammatory cytokines (TNFα, IL1β, and IL6)  
52 that further fuel inflammation. Over the course of several days, the inflammatory phase gives

53 way to a healing phase, dominated by a second wave of M $\phi$ s, this time Ly6C<sup>low</sup> reparative  
54 M $\phi$ s with the capacity to dampen inflammation and promote ECM reconstruction and  
55 angiogenesis. These latter M $\phi$ s are characterized by the secretion of anti-inflammatory (IL10),  
56 angiogenic (VEGF), and pro-fibrotic (TGF $\beta$ 1) factors, as well as matrix metalloproteinases  
57 (MMPs), which promote tissue remodeling (Nahrendorf et al., 2007; Walter et al., 2018).  
58 However, how these factors produced by M $\phi$ s crosstalk with other cell types and orchestrate  
59 cardiac repair is still not-fully elucidated.

60 MMPs are a family of zinc-dependent endopeptidases that have been traditionally  
61 associated with the degradation and turnover of ECM components. MMPs are now known to  
62 directly and indirectly regulate cell behavior and microenvironment through the proteolytic  
63 processing of a large variety of molecules, such as membrane receptors and growth factors  
64 (Page-McCaw et al., 2007). Membrane type 1 matrix metalloproteinase (MT1-MMP/*Mmp14*)  
65 was the first membrane-anchored MMP to be described (Sato et al., 1994), and the cell  
66 surface location provides this enzyme with exclusive functions affecting cellular behavior.  
67 MT1-MMP is involved in the degradation of a spectrum of structural matrix proteins (including  
68 collagens I, II, and III, fibronectin, and laminin), the proteolytic processing of growth factors  
69 and cytokines (e.g., TGF $\beta$  and SDF-1), and the activation of other MMPs (e.g., pro-MMP2),  
70 expanding MT1-MMP functional pleiotropism.

71 Previous studies pointed out a deleterious role of MT1-MMP in post-MI cardiac  
72 remodeling, mostly related to its collagenase activity in fibroblasts (Koenig et al., 2012).  
73 Nevertheless, specific M $\phi$  MT1-MMP contribution to cardiac healing response has never been  
74 addressed. In this study, we demonstrate that M $\phi$ -restricted MT1-MMP deletion attenuates  
75 post-MI left ventricular (LV) dysfunction by preventing endothelial-to-mesenchymal transition  
76 (EndMT) and propose new treatment options for cardiac ischemic disease based on the  
77 modulation of M $\phi$  MT1-MMP activity.

## 78 **RESULTS**

### 79 **MI induced the expression of *Mmp14* in M $\phi$ s**

80 To gain insight into the potential contribution of M $\phi$ -produced MT1-MMP to cardiac  
81 healing, we induced MI in adult mice by permanent coronary ligation (LAD-ligation). Using an  
82 established gating strategy (Walter et al., 2018), we isolated cardiac M $\phi$ s at 0, 3, 7 and 28  
83 days post-MI (Figure 1- Figure supplement 1A-B) and assessed gene expression related to  
84 ECM remodeling (Figure 1A). MI induced expression of *Mmp14* (MT1-MMP) and its substrates  
85 *Mmp2* and *Col1a1* in M $\phi$ s in the heart, reaching maximum levels of expression on day 7 post-  
86 MI. In contrast, other MMP family members (*Mmp9* and *Mmp13*) were downregulated after  
87 infarction.

88 **M $\phi$ -restricted MT1-MMP deficiency attenuates LV dysfunction and dilation and reduces**  
89 **collagen deposition after MI**

90 To explore the role of M $\phi$ -derived MT1-MMP in post-MI LV function and remodeling,  
91 we generated a M $\phi$ -specific KO mouse for *Mmp14*. LysM-Cre mice (Clausen et al., 1999)  
92 were crossed with MT1-MMP<sup>ff</sup> mice (Gutierrez-Fernandez et al., 2015), resulting in the  
93 deletion of exons 4 and 5 in the floxed *Mmp14* allele in MT1-MMP $\Delta$ LysM mice (Cre<sup>+</sup> mice) (Figure  
94 1- Figure supplement 2A). MT1-MMP<sup>ff</sup> littermates (Cre<sup>-</sup>) were used as controls. No significant  
95 differences in either baseline cardiac function (Table 1) or in circulating monocytes and  
96 neutrophils were found between genotypes (Table 2, and Figure 1- Figure supplement 2B-C).  
97 *Mmp14* was efficiently deleted in BM-derived M $\phi$ s (BMDMs) and in cardiac M $\phi$ s sorted from  
98 7-day-post-MI MT1-MMP $\Delta$ LysM hearts; in contrast, *Mmp14* expression did not differ between  
99 ECs purified from MT1-MMP<sup>ff</sup> and MT1-MMP $\Delta$ LysM 7-day-post-MI hearts (Figure 1- Figure  
100 supplement 2D). The low efficiency recombination of LysM-Cre system in monocytes and  
101 dendritic cells (Abram et al., 2014) and the lack of MT1-MMP expression in neutrophils  
102 (Daseke et al., 2019) make MT1-MMP $\Delta$ LysM mouse a suitable model to study M $\phi$ -MT1-MMP  
103 role in post-MI LV remodeling and function.

104 Echocardiography revealed that M $\phi$ -deletion of MT1-MMP ameliorated LV dysfunction  
105 and prevented LV dilation post-MI, with MT1-MMP $\Delta$ LysM mice having a significantly higher LV  
106 ejection fraction (LVEF) and lower LV end-diastolic volume (LVVold) (Figure 1B-C, and Video  
107 1). Infarct size and LV wall motion score index (WMSI) were calculated to assess global and  
108 regional cardiac contractility abnormalities by echocardiography (see Materials and Methods).  
109 This analysis showed that LAD-ligation produced smaller infarcts and a lower WMSI in MT1-  
110 MMP $\Delta$ LysM mice (Figure 1D-E), indicating better preservation of cardiac function and less  
111 pronounced wall-motion abnormalities in the LV when M $\phi$  MT1-MMP was absent.

112 MT1-MMP can process a variety of ECM components, so we next analyzed the fibrotic  
113 response to MI. Transverse sections of 28-day-post-MI hearts were assessed using a multi-  
114 photon laser scanning microscope to capture multi-photon autofluorescence (MPEF) and  
115 second harmonic generation (SHG) signals, allowing simultaneous visualization of myocyte  
116 components and fibrillary collagen, respectively. SHG images of the infarct zone (IZ) revealed  
117 a highly directional and organized collagen fibril morphology in the MT1-MMP<sup>ff</sup> infarcted  
118 group, whereas a less-organized and sparse collagen structure was observed in MT1-  
119 MMP $\Delta$ LysM infarcted hearts (Figure 1F). Quantification of SHG signals revealed a marked drop  
120 in fibrillary collagen density in MT1-MMP $\Delta$ LysM infarcted hearts (Figure 1G). In addition, the  
121 analysis of first-order features of collagen fibrils in SHG images showed augmented skewness  
122 and kurtosis in MT1-MMP $\Delta$ LysM mice, indicating thinner and underdeveloped, disarrayed  
123 collagen fibers and thus lower tissue stiffness (Figure 1G).

124 We next investigated the effect of M $\phi$ -specific MT1-MMP deletion during transient  
125 ischemia/reperfusion (I/R) model of MI. Similar to the permanent occlusion model, transient  
126 ischemia impaired LV function in both genotypes, but MT1-MMP $\Delta$ LysM mice had a significantly  
127 higher LVEF and lower LV end-systolic and end-diastolic internal diameters (LVIDs and  
128 LVIDd, respectively), indicating better preserved LV function and prevention of LV dilation  
129 (Figure 1- Figure supplement 3A). Moreover, SHG imaging analysis after I/R revealed a  
130 weaker fibrotic response, with thinner and sparser collagen fibers in MT1-MMP $\Delta$ LysM hearts  
131 (Figure 1- Figure supplement 3B-C).

132 These data indicate that M $\phi$  MT1-MMP-deficiency decreases collagen fiber  
133 deposition, producing a smaller and underdeveloped fibrotic scar that results in relatively low  
134 LV dilation and ameliorated systolic dysfunction after transient or permanent cardiac ischemia.

### 135 **MT1-MMP $\Delta$ LysM mice have a preserved microvasculature network and better** 136 **myocardial oxygenation after ischemic injury**

137 Confocal images of MT1-MMP $^{ff}$  and MT1-MMP $\Delta$ LysM 7-day-post-MI hearts stained for  
138 CD31 (endothelial marker) and SMA (smooth muscle actin) were evaluated with a fully  
139 automated 3D pipeline (Materials and Methods), which allows reconstruction and  
140 quantification of the microvasculature (Gkontra et al., 2018b) (Table 3). MT1-MMP $\Delta$ LysM 7-day-  
141 post-MI hearts had a higher vascular volume density and more capillaries and ECs within the  
142 infarction than controls (Figure 2A-B). Oxygen diffusion from blood to tissue critically depends  
143 on the density and arrangement of the microvascular bed. Accordingly, in MT1-MMP $\Delta$ LysM  
144 hearts, we observed increased capillary density and reduced intercapillary and diffusion  
145 distances, parameters proposed as indices of oxygen diffusion (Gkontra et al., 2018b),  
146 suggesting better oxygen diffusion in the infarcted myocardium (Figure 2B). We next assessed  
147 hypoxia in the post LAD-ligation myocardium by carbonic anhydrase IX (CA-IX) staining  
148 (Figure 2C), which revealed a smaller CA-IX+ area in the infarction of 7-day-post-MI MT1-  
149 MMP $\Delta$ LysM hearts than in controls (Figure 2C-D), confirming better preserved tissue  
150 oxygenation after MI. No hypoxia signal was found in the non-infarcted tissue (Figure 2- Figure  
151 supplement 1A-B). Although there were no between-genotype differences in arteriole (SMA+  
152 vessels) density, there was a trend toward thinner arteriole vessel walls at 7 days post-MI in  
153 MT1-MMP $\Delta$ LysM infarcted hearts (Figure 2- Figure supplement 1C-D), suggesting amelioration  
154 of MI-induced arterial hyperplasia (Krishnamurthy et al., 2009) in the absence of M $\phi$  MT1-  
155 MMP.

### 156 **The absence of M $\phi$ MT1-MMP impairs active TGF $\beta$ 1 release from LAP-TGF $\beta$ 1 complex**

157 To elucidate the mechanism by which M $\phi$  MT1-MMP regulates microvascular density  
158 and fibrosis, we sought soluble factors whose release might be affected by MT1-MMP. Two

159 independent proteomics studies previously performed in our laboratory detected a 1.25- to 2-  
160 fold increase in TGF $\beta$ 1 content in the membrane-enriched subcellular fraction of MT1-MMP<sup>-/-</sup>  
161 BMDMs. The small latent complex (SLC) consisting of latency associated peptide (LAP) and  
162 mature TGF $\beta$ 1 can be retained at the cell surface through LAP binding to membrane receptors  
163 (e.g. integrin  $\alpha$ v $\beta$ 8) (Figure 3A). It has been shown that MT1-MMP promotes TGF $\beta$ 1 activation  
164 via integrin  $\alpha$ v $\beta$ 8 at the cell surface (Mu et al., 2002), and that TGF $\beta$ 1 modulates myocardial  
165 healing through effects on the fibrotic and angiogenic responses (Frangogiannis, 2020).

166 To investigate the possible role of M $\phi$ -derived MT1-MMP in TGF $\beta$ 1 release after MI,  
167 we used flow cytometry to measure latent TGF $\beta$ 1 (LAP-TGF $\beta$ 1 complex) on the surface of  
168 LPS-stimulated MT1-MMP<sup>fl/fl</sup> and MT1-MMP $\Delta$ LysM BMDMs (Figure 3A-C). MT1-MMP $\Delta$ LysM M $\phi$ s  
169 had a higher content of LAP and TGF $\beta$ 1, revealing significantly higher surface retention of  
170 LAP-TGF $\beta$ 1 than observed in WT M $\phi$ s (Figure 3B-C). To validate this observation, we  
171 detected TGF $\beta$ 1 by immunoblot in membrane and cytosolic subcellular fractions and total cell  
172 lysates of LPS-stimulated MT1-MMP<sup>fl/fl</sup> and MT1-MMP $\Delta$ LysM BMDMs (Figure 3D). Latent TGF $\beta$ 1  
173 (~50 kDa) consisting of LAP (35 kDa) covalently bound to the mature TGF $\beta$ 1 (12.5 kDa)  
174 preferentially located in the membrane and was more abundant in MT1-MMP $\Delta$ LysM M $\phi$ s (Figure  
175 3C-D). In line with the reported role of MT1-MMP in posttranslational processing of pro-TGF $\beta$ 1,  
176 we found no difference in *Tgfb1* transcript levels between MT1-MMP<sup>L/fl</sup> and MT1-MMP $\Delta$ LysM  
177 BMDMs (Figure 3E).

178 We next queried whether impaired processing of LAP-TGF $\beta$ 1 complex by MT1-MMP-  
179 deficient M $\phi$ s affects secretion of active TGF $\beta$ 1. Since active TGF $\beta$ 1 has an estimated half-  
180 life of 2-3 minutes, and only 2%-5% of total TGF $\beta$ 1 is thought to be activated at any given time  
181 (Lawrence, 2001), we measured bioactive TGF $\beta$ 1 using a standardized luciferase assay  
182 (Materials and Methods). Responsiveness of the luciferase construct to TGF $\beta$ 1 was confirmed  
183 by treating transfected HEK293 cells with TGF $\beta$ 1 (2.94  $\pm$  0.06 fold-increase in arbitrary  
184 luciferase units (ALU) with respect to the control). Luciferase activity was then assessed in  
185 transfected HEK293 cells cultured in the presence or absence of LPS-stimulated BMDMs for  
186 24 h (Figure 3F). HEK293 co-culture with MT1-MMP<sup>fl/fl</sup> BMDMs produced abundant levels of  
187 active TGF $\beta$ 1, whereas active TGF $\beta$ 1 was undetectable after co-culture with MT1-MMP $\Delta$ LysM  
188 BMDMs (Figure 3F). TGF $\beta$ 1 levels in KO BMDMs were restored by transduction with full-  
189 length (FL) MT1-MMP but not with a catalytic mutant (E240A), demonstrating that MT1-MMP-  
190 dependent TGF $\beta$ 1 activation requires MT1-MMP catalytic activity (Figure 3G).

191 **The absence of M $\phi$  MT1-MMP reduces TGF $\beta$ 1-pSMAD2 signaling in cardiac ECs,**  
192 **MyoFBs, and VSMCs after MI**

193 We explored if defective release of active TGF $\beta$ 1 by MT1-MMP-deficient M $\phi$ s could  
194 affect TGF $\beta$ 1-mediated SMAD2/3 in the myocardium. We quantified phosphorylated SMAD2  
195 (pSMAD2) in M $\phi$ s, ECs and MyoFBs by flow cytometry in 7-day-post-MI hearts (Figure 4A-B).  
196 M $\phi$ s were defined as CD45<sup>+</sup>CD11b<sup>+</sup>F4/80<sup>+</sup> cells, and ECs as CD45<sup>-</sup>CD31<sup>+</sup> cells (Figure 4A).  
197 Cardiac fibroblast convert to MyoFBs with injury to mediate healing after MI and platelet-  
198 derived growth factor receptor  $\beta$  (PDGFR $\beta$ ) induction is an early feature of MyoFB activation  
199 (Henderson et al., 2013). PDGFR $\beta$  is also expressed by VSMCs (Gkontra et al., 2018b).  
200 Therefore, MyoFBs and VSMCs were described as CD45<sup>-</sup>CD31<sup>-</sup>PDGFR $\beta$ <sup>+</sup> cells (Figure 4A).  
201 MyoFBs also express other classic fibroblast-associated markers as *Cdh2*, *Col1a1*, *Col1a2*,  
202 *Col1a3* (Figure 5- Figure supplement 1A-B). There was no between-genotype difference in  
203 pSMAD2 abundance in M $\phi$ s; however, pSMAD2 was significantly less abundant in ECs and  
204 MyoFBs/VSMCs from MT1-MMP $\Delta$ LysM hearts (Figure 4B-C), suggesting that lack of M $\phi$  MT1-  
205 MMP impairs paracrine TGF $\beta$ 1-pSMAD2 signaling in ECs and MyoFBs/VSMCs. To  
206 distinguish between pSMAD2 in MyoFBs (non-vascular-related SMA<sup>+</sup> cells) and VSMCs  
207 (vascular-related SMA<sup>+</sup> cells), we performed confocal imaging analysis at 7 days post-MI  
208 which revealed that pSMAD2-positive MyoFBs and VSMCs were both less abundant in MT1-  
209 MMP $\Delta$ LysM hearts than in MT1-MMP<sup>fl/fl</sup> hearts (Figure 4D-E).

#### 210 **M $\phi$ -derived MT1-MMP induces EndMT after MI**

211 We found that M $\phi$  MT1-MMP deletion altered the cellular composition of the infarcted  
212 myocardium, with MT1-MMP $\Delta$ LysM mice showing fewer M $\phi$ s, indicating a less inflammatory  
213 state; more ECs, in line with the microvasculature image analysis data; and fewer MyoFBs, in  
214 agreement with the reduced fibrotic response (Figure 5A-B). Additionally, we detected an  
215 intermediary population of cells with mild levels of both CD31 (endothelial marker) and  
216 PDGFR $\beta$  (mesenchymal marker) (Figure 5A). This population is suggestive of transitioning  
217 cells undergoing endothelial to mesenchymal transition (EndMT) (Aisagbonhi et al., 2011). To  
218 confirm the occurrence of EndMT in the context of MI, we performed lineage tracing  
219 experiments in *Cdh5-Cre*<sup>ERT2</sup> R26Tomato control and infarcted mice and asked whether we  
220 could find endothelial-cell derived Tomato<sup>+</sup> cells within the MyoFB compartment using flow  
221 cytometry (Figure 5- Figure supplement 2A-E). We detected an increase in Tomato<sup>+</sup>PDGFR $\beta$ <sup>+</sup>  
222 cells in 7-day-post-MI hearts (Figure 5- Figure supplement 2D, E), confirming that EndMT is  
223 triggered upon MI as previously reported (Aisagbonhi et al., 2011). We confirmed the  
224 transitioning phenotype of CD31<sup>+</sup>PDGFR $\beta$ <sup>+</sup> cells by qPCR and observed the loss of  
225 endothelial markers (i.e. *Pecam*, *Cdh5*, *Kdr*, *Tie2*, *Col4a2*), the acquisition of mesenchymal  
226 genes (i.e. *Cdh2*, *Tagln*, *Col1a1*, *Col1a2*, *Col3a1*), and the upregulation of EndMT-mediating  
227 transcriptional factors (i.e. *Zeb2* and *Snai1*) (Figure 5- Figure supplement 1A-B). Interestingly,  
228 these cells were less abundant in M $\phi$ -MT1-MMP deficient hearts (Figure 5A-B), suggesting

229 that EndMT is impaired in the absence of M $\phi$  MT1-MMP. We confirmed the results obtained  
230 with PDGFR $\beta$  staining by the complementary staining for MEFSK4 (Figure 5- Figure  
231 supplement 3A, B), another marker for cardiac fibroblasts (Pinto et al., 2016).

232 TGF $\beta$  is considered the master mediator of EndMT, in a SMAD-dependent manner  
233 (Frangogiannis, 2020). We found by immunofluorescence triple positive cells for the  
234 endothelial nuclear marker ERG, the mesenchymal marker SMA and pSMAD2, reflecting the  
235 transition of endothelial cells towards a mesenchymal phenotype via SMAD2 activation in the  
236 infarcted cardiac tissue (Figure 5- Figure supplement 3C-D). We therefore studied the effect  
237 on post-MI EndMT of the impaired TGF $\beta$ 1 production by MT1-MMP-deficient M $\phi$ s, and the  
238 associated reduction in paracrine pSMAD2 signaling in ECs. For that, we co-cultured purified  
239 MAECs with LPS-activated MT1-MMP<sup>ff</sup> or MT1-MMP <sup>$\Delta$ LysM</sup> BMDMs (Figure 6- Figure  
240 supplement 1). Immunofluorescence analysis with the endothelial marker CD31 and the  
241 mesenchymal marker SMA revealed morphological changes in MAECs after co-culture with  
242 MT1-MMP<sup>ff</sup> BMDMs, with cells progressively losing their cobblestone appearance and  
243 adopting a dispersed, spindle-shaped morphology (Figure 6- Figure supplement 1A).  
244 Moreover, MAECs co-cultured with MT1-MMP<sup>ff</sup> BMDMs significantly decreased CD31  
245 expression and acquired SMA expression, indicating the acquisition of molecular traits of a  
246 mesenchymal phenotype (Figure 6- Figure supplement 1A-B). This phenotype was similar to  
247 the effects of recombinant TGF $\beta$ 1 stimulation (Figure 6- Figure supplement 1A-B). In contrast,  
248 co-culture of MAECs with MT1-MMP <sup>$\Delta$ LysM</sup> BMDMs led neither to the loss of endothelial features  
249 nor to the acquisition of mesenchymal markers (Figure 6- Figure supplement 1A-B). Altered  
250 expression of endothelial and mesenchymal markers in the co-cultures was confirmed by  
251 qPCR. In accordance with the immunofluorescence data, the co-culture of MAECs with MT1-  
252 MMP<sup>ff</sup> BMDMs caused the downregulation of EC-related genes (*Pecam*, *Kdr*, and *Col4a2*)  
253 and the upregulation of mesenchymal genes (*Tagln* and *Acta2*) and the direct TGF $\beta$ 1 target  
254 *Pai1*. A similar phenotype was induced by TGF $\beta$ 1-treatment. In contrast, these changes  
255 toward a mesenchymal phenotype in MAECs were not triggered by co-culture with MT1-  
256 MMP <sup>$\Delta$ LysM</sup> BMDMs (Figure 6- Figure supplement 1C).

257 To confirm M $\phi$  MT1-MMP-dependent induction of EndMT *in vivo* following MI, we first  
258 investigated TGF $\beta$ 1 processing in cardiac M $\phi$ s. LAP and TGF $\beta$ 1 were both significantly  
259 increased on the surface of MT1-MMP <sup>$\Delta$ LysM</sup> M $\phi$ s after MI, indicating the retention of latent  
260 TGF $\beta$ 1 (Figure 6A). We then sorted cardiac M $\phi$ s from 7-day-post-MI MT1-MMP<sup>ff</sup> and MT1-  
261 MMP <sup>$\Delta$ LysM</sup> hearts (Figure 1- Figure supplement 1A-B) and co-cultured them with luciferase-  
262 transfected HEK293 cells. As with BMDMs, post-MI WT cardiac M $\phi$ s produced detectable  
263 levels of active TGF $\beta$ 1, whereas the deletion of M $\phi$  MT1-MMP abrogated TGF $\beta$ 1 activation  
264 (Figure 6B). In co-culture experiments, MT1-MMP<sup>ff</sup> cardiac M $\phi$ s induced EndMT in MAECs,



265 downregulating CD31 expression and increasing SMA expression. In contrast, no transition to  
266 a mesenchymal phenotype was evident in MAECs co-cultured with MT1-MMP-deficient  
267 cardiac M $\phi$ s (Figure 6C-D).

## 268 **DISCUSSION**

269 MI results in loss of cardiomyocytes, adverse structural remodeling, and LV  
270 dysfunction and dilation, eventually causing heart failure. Since appropriate cardiac repair  
271 requires a balanced inflammatory response to avoid adverse cardiac remodeling after MI, M $\phi$ s  
272 have emerged as likely candidates for investigation and therapeutic intervention. Our results  
273 show that post-MI M $\phi$ s have heightened expression of *Mmp14* as well as its substrates *Mmp2*  
274 and *Col1a1*, in line with a role in tissue remodeling and collagen deposition (O'Rourke et al.,  
275 2019). Although ECM remodeling and granulation tissue formation are prerequisites for tissue  
276 repair, excessive MMP activity after MI and subsequent ECM turnover can result in adverse  
277 remodeling and worsened cardiac dysfunction (Spinale et al., 2010). Therefore, we  
278 hypothesized that M $\phi$ -specific deletion of MT1-MMP might limit adverse remodeling and LV  
279 dilation and dysfunction after MI.

280 Although MT1-MMP <sup>$\Delta$ lysM</sup> mice are phenotypically normal under homeostatic  
281 conditions, these animals were protected when challenged by acute MI. MT1-MMP <sup>$\Delta$ lysM</sup> mice  
282 had smaller infarcts and better LV contractility after MI than controls, as well as significantly  
283 improved preservation of systolic function and LV structure. A detrimental role of MT1-MMP  
284 in post-MI cardiac remodeling has been identified using mouse infarct models, leading to  
285 worsening cardiac function and reduced survival (Koenig et al., 2012; Spinale et al., 2010;  
286 Zavadzkas et al., 2011). These studies attributed this detrimental role to MT1-MMP  
287 collagenase activity in fibroblasts, disregarding its actions in M $\phi$ s (Koenig et al., 2012). Our  
288 data obtained with the MT1-MMP <sup>$\Delta$ lysM</sup> model are the first demonstrating the beneficial effect  
289 of M $\phi$ -specific MT1-MMP deletion in preventing adverse LV remodeling after MI. This effect  
290 is likely caused by the lower myocardial fibrosis, allowing the heart to work at less of a  
291 mechanical disadvantage, and better oxygenation of the infarcted myocardium due to the  
292 preservation of the microvasculature network.

293 Loss of collagenase activity in MT1-MMP <sup>$\Delta$ lysM</sup> mice might be expected to lead to a  
294 dense scar. However, in addition to its collagenolytic activity (Ohuchi et al., 1997), MT1-MMP  
295 proteolytically processes a diverse range of biologically active signaling molecules (Koziol et  
296 al., 2012); stimulation of collagen synthetic pathways by these molecules would explain the  
297 observed phenotype of post-MI MT1-MMP <sup>$\Delta$ lysM</sup> mice. Pro-TGF $\beta$  has been recognized as a  
298 target for MT1-MMP-mediated cleavage in several contexts (Koziol et al., 2012; Mu et al.,  
299 2002). Our results provide evidence for MT1-MMP-mediated activation of latent LAP-TGF $\beta$ 1

300 complex in cardiac Mφs after MI. Dampened processing and release of active TGFβ1 in MT1-  
301 MMP<sup>ΔLysM</sup> mice was associated with a decrease in SMAD2-mediated signaling in the infarcted  
302 myocardium, providing a mechanism for the reduced pro-fibrotic response and preservation  
303 of microvasculature network. Previous studies identified MT1-MMP as an inducer of fibrosis  
304 through its cleavage of latent-transforming growth factor beta-binding protein 1 (LTBP1) and  
305 activation of TGFβ-mediated SMAD2/3 signaling in the infarcted myocardium (Spinale et al.,  
306 2010; Zavadzkas et al., 2011). Suppressed TGFβ1 production could also underlie the  
307 preservation of the microvasculature network in MT1-MMP<sup>ΔLysM</sup> mice, through the loss of  
308 TGFβ1 angiostatic effects (Arnold et al., 2014; Imaizumi et al., 2010).

309 TGFβ-mediated EndMT has been identified during cardiac fibrosis (Zeisberg et al.,  
310 2007), contributing to collagen matrix deposition and disease. The concomitant loss of  
311 functional ECs may also lead to capillary rarefaction, thus causing tissue ischemia, a potent  
312 driver of fibrosis. EndMT is essential for cardiac valve formation and vascular development in  
313 embryogenic stages as well as in the pathogenesis of diverse cardiovascular disorders, such  
314 as congenital heart disease (Hofmann et al., 2012; Xu et al., 2015). The contribution of EndMT  
315 to cardiac fibrosis remains however a matter of debate, which depends on the nature of the  
316 cardiovascular injury and the extent of the fibrosis (Aisagbonhi et al., 2011; Evrard et al., 2016;  
317 Kanisicak et al., 2016; Moore-Morris et al., 2014; Zeisberg et al., 2007). For example, EndMT  
318 is minimal in pressure overload or I/R models, where the intensity of inflammatory and fibrotic  
319 responses is much lower than after acute ischemic injury (Moore-Morris et al., 2014; Xia et al.,  
320 2009). Besides, the tools employed for assessing EndMT present several limitations; for  
321 instance, immunofluorescence techniques are not sensible enough to reliably detect and  
322 quantify dim levels of protein expression that characterize cells under EndMT transition.  
323 Lineage tracing experiments are a preferable approach, although the specificity of the driver  
324 represents also a caveat (Kovacic et al., 2019; Li et al., 2018; Piera-Velazquez and Jimenez,  
325 2019).

326 Our results using flow cytometry, a technique that allowed us to finely track shifts in  
327 the expression of markers associated to EndMT, showed changes in ECs, 'transitioning cells',  
328 and MyoFBs that demonstrate a role of Mφ-derived MT1-MMP in TGFβ1-mediated EndMT  
329 after MI, contributing to the observed phenotype. This conclusion is further supported by the  
330 identification of ERG<sup>+</sup>SMA<sup>+</sup> cells with active SMAD2 signaling pathway within the infarction  
331 and by the results obtained in *in vitro* experiments. Our findings are in line with the role of  
332 MT1-MMP as an activator of epithelial to mesenchymal transition (EMT) in other  
333 pathophysiological contexts such as development, cancer, and lung fibrosis (Garmon et al.,  
334 2018; Nguyen et al., 2016; Xiong et al., 2017). Interestingly, a recent scRNAseq study carried  
335 out on healthy and post-infarcted hearts identified a subset of post-MI Mφs with a HIF1α-

336 dependent signature, which specifically upregulated *Mmp14* expression (Dick et al., 2019).  
337 *Mmp14* expression in these cells converge with a hypoxia-driven program, which represents  
338 a well-known stimulus for EndMT (Evrard et al., 2016), further supporting the implication of  
339 *Mmp14*-expressing post-MI Mφs in EndMT. Moreover, Mφs have recently been reported as  
340 inducers of EndMT in atherosclerosis (Helmke et al., 2019).

341 Based on our discoveries, we propose that MT1-MMP mediated TGFβ1-activation in  
342 Mφs after ischemic injury triggers local EndMT and generation of MyoFBs during granulation  
343 tissue formation. These cells might then take part in fibrosis, giving rise to a dense fibrotic scar  
344 that compromises LV cardiac function after MI. Restraining Mφ-mediated TGFβ1 activation by  
345 MT1-MMP thus limits EndMT, favoring preservation of cardiac microvasculature, improving  
346 myocardial blood flow, and reducing tissue hypoxia and fibrotic scarring (Figure 7). These  
347 alterations in MT1-MMP<sup>ΔLysM</sup> mice limited LV dilation and dysfunction and suggest novel  
348 approaches to the promotion of cardiac recovery after MI. Therapeutic strategies would consist  
349 of manipulating Mφ MT1-MMP production in order to control EndMT, thus promoting  
350 angiogenesis and moderating scar formation. Interestingly, in an experimental rat model of  
351 MI, treatment with menstrual-blood-derived mesenchymal stem cells has been shown to  
352 protect endothelial function, reduce infarct size, decrease cardiac fibrosis, and downregulate  
353 TGFβ1/SMAD signaling, all through the comprehensive inhibition of EndMT (Zhang et al.,  
354 2013). Following this rationale, previous studies have pointed to the beneficial effect of  
355 pharmacological inhibition of MMPs on post-MI cardiac remodeling; however, implementation  
356 of clinically relevant therapies has proved difficult (Creemers et al., 2001; Hudson et al., 2006;  
357 Yabluchanskiy et al., 2013). A recent study reported that selective MT1-MMP inhibition  
358 rescued tissue damage and mortality in influenza-infected mice, demonstrating the potential  
359 of specific MT1-MMP inhibitors to ameliorate the detrimental effects of this protease on tissue  
360 remodeling (Talmi-Frank et al., 2016). Controlling dysregulated myocardial MT1-MMP activity  
361 in Mφs could be a suitable option for patients at risk of developing heart failure after MI.

## 362 MATERIAL AND METHODS

### 363 Mice

364 All the animals used in this study were on the C57BL/6 background. Experiments were  
365 performed in 8- to 12-week-old both male and female mice, unless otherwise indicated, kept  
366 in a specific pathogen-free (SPF) facility at Centro Nacional de Investigaciones  
367 Cardiovasculares Carlos III (CNIC) under a 12 h light/dark cycle (lights on from 07:00 to 19:00  
368 h), with water and chow available *ad libitum*. All animal procedures were conducted in  
369 accordance with EU Directive 86/609/EEC and approved by the Animal Subjects Committee  
370 of the Instituto de Salud Carlos III (Madrid, Spain) and Madrid Community Organs in the

371 PROEX 188/26. Animals used in this study were C57BL/6 mice (Charles River), LysMCre  
372 mice (Clausen et al., 1999), and *Mmp14<sup>fl/fl</sup>* mice (Gutierrez-Fernandez et al., 2015). LysM-  
373 *Cre<sup>+</sup>/Mmp14<sup>fl/fl</sup>* mice (MT1-MMP<sup>ΔLysM</sup>) lack MT1-MMP in Mφs; while LysM-*Cre<sup>-</sup>/Mmp14<sup>fl/fl</sup>*  
374 littermates (MT1-MMP<sup>fl/fl</sup>) were used as WT controls. For endothelial lineage tracing  
375 experiments, we used *Cdh5-Cre<sup>ERT2</sup>* mice (Wang et al., 2010) crossed with R26TdTomato  
376 mice (Madisen et al., 2010). Tamoxifen (Sigma-Aldrich) was dissolved in corn oil (15 mg / ml)  
377 and injected intraperitoneally (0.15 mg tamoxifen / g mouse body weight) 5 days before LAD-  
378 ligation surgery.

## 379 **Mouse models of MI**

### 380 **1. Left anterior descending coronary artery ligation (LAD-ligation)**

381 Permanent ligation of the left anterior descendent (LAD) coronary artery was  
382 performed as previously described (Kolk et al., 2009). Briefly, mice were anesthetized with  
383 sevoflurane (5% for induction, 2%-3% for maintenance), and intubated using a 24-gauge  
384 intravenous catheter with a blunt end. Mice were artificially ventilated with a mixture of O<sub>2</sub> and  
385 air [1:1 (vol/vol)] using rodent ventilator (minivent 845) with 160 strokes/min in a total volume  
386 of 250 μl. The mouse was placed on heating pad to maintain body temperature at 37°C. A  
387 thoracotomy was performed through the fourth left intercostal space, the pericardium was  
388 opened, and the heart was exposed. The proximal LAD coronary artery was permanently  
389 ligated with 7/0 silk suture (Lorca Marín). The thorax and the skin incision were closed with  
390 6/0 silk sutures (Lorca Marín) and buprenorphine (0.01 mg/kg, Buprex, Merck & Co. Inc) was  
391 given for pain relief. Mice were sacrificed by CO<sub>2</sub> inhalation 3, 7, or 28 days post-MI. Animals  
392 not subjected to surgery were included as the physiological condition (day 0).

### 393 **2. Ischemia-reperfusion (I/R)**

394 I/R protocol was performed as previously described (Inserte et al., 2019), following the  
395 same anesthetic and thoracotomy protocol as in permanent LAD-ligation. Once the heart was  
396 exposed, the LAD coronary artery was ligated approximately 1 mm below the edge of the left  
397 atrial appendage with an 8/0 silk suture (EthiconEndo-surgery, OH, USA). Regional ischemia  
398 was verified by visual pallor and QRS alterations within the first seconds of occlusion. After  
399 occlusion for 45 min, the suture was loosened to start reperfusion. The thorax and the skin  
400 incision were closed with 6/0 silk sutures (Lab Arago, Spain) and buprenorphine (0.01 mg/kg,  
401 Buprex, Merck & Co. Inc) was given for pain relief. Mice with lack of ST-elevation during  
402 ischemia or lack of ST-recovery at reperfusion were excluded from further evaluation. Mice  
403 were sacrificed by CO<sub>2</sub> inhalation 21 days post-MI. Animals not subjected to surgery were  
404 included as the physiological condition (day 0).

405 For the two models of MI, mice with less than two affected LV segments after the  
406 surgery in terms of contractility were considered non-properly infarcted and excluded from the  
407 study.

#### 408 **Echocardiographic analysis**

409 Transthoracic echocardiography was performed on mice subjected to LAD-ligation or  
410 I/R at basal, 7, and 21 or 28 days post-surgery. Shaved mice were anesthetized by inhalation  
411 of isoflurane and oxygen (1.25% and 98.75%, respectively) and placed in a biofeedback  
412 warming station that maintained core body temperature. Anesthesia depth was adjusted to  
413 maintain heart rate between 450 and 550 beats per minute. Warm ultrasound gel was applied  
414 to the chest of the animals, and echocardiography measurements were obtained using the  
415 VEVO 2100 high frequency ultrasound system with a linear transducer MS400 18–38 MHz  
416 (Visual Sonics, Toronto, Canada). Parasternal long- and short- axis views at 3 levels (base,  
417 middle and apex) in two-dimensional and M-mode were obtained as described previously  
418 (Cruz-Adalia et al., 2010). The LV end-systolic and end-diastolic volume (LVVols and LVVold,  
419 respectively) were acquired from the parasternal two-dimensional long-axis view, and LV  
420 ejection fraction (LVEF) was calculated using the area-length method (Ram et al., 2011). Wall  
421 thickness at the end of the systole and diastole was measured from the M-mode short-axis  
422 view. Analysis was performed off-line by two blinded echocardiography experts. Ultrasounds  
423 were performed in collaboration with Dr. María Villalba-Orero at CNIC.

424 Regional kinetic abnormalities within the LV were assessed. LV wall motion score  
425 index (WMSI) was calculated in order to assess global and regional cardiac function by a 12-  
426 based segment model, considering parasternal two-dimensional short and long axis views at  
427 the 3 levels, as previously described (Gallego-Colon et al., 2016). In each level, the LV was  
428 further divided in 4 segments (anterior, lateral, posterior, and septal) and every segment was  
429 scored according its severity in terms of contraction as 1 (normal), 2 (hypokinesia), 3  
430 (akinesia), 4 (dyskinesia or aneurysm). Infarct size was estimated as the percentage of  
431 individual segments scored  $> 1$  (reflecting contractility abnormalities) over the total of LV  
432 segments, and WMSI was defined as the ratio of the sum of the score of every segment over  
433 the total number of segments evaluated.

#### 434 **Flow cytometry and cell sorting**

435 Cardiac single-cell suspensions were obtained as previously described (Alonso-  
436 Herranz et al., 2019). Briefly, mice were euthanized by CO<sub>2</sub> fixation and immediately perfused  
437 by intracardiac injection of cold PBS. Right and left atria were removed and the whole  
438 ventricles were minced with fine scissors and digested in collagenase IV 0.1% (528 U/mg  
439 Sigma) in PBS at 37°C for 45 minutes under gentle shaking. Cells were then filtered through

440 nylon mesh of 100  $\mu\text{m}$  (BD biosciences) to obtain a homogeneous cell suspension and were  
441 subjected to red blood cells lysis with RBC Lysis buffer solution (eBioscience). Single cell  
442 suspensions were Fc-blocked using anti-mouse CD16/CD32 antibody (BD Pharmingen) 10  
443 minutes at 4° C in FACS buffer (PBS 2% FBS 5mM EDTA). Antibodies were incubated for 30  
444 minutes at 4° C in FACS buffer. Where appropriate, cells were further incubated with  
445 streptavidin conjugates for 30 minutes at 4° C. For nuclear pSMAD2 staining, cells were fixed  
446 and permeabilized using a commercial kit (Foxp3/Transcription Factor Staining Buffer Set,  
447 eBioscience). Flow cytometry studies were performed in a BD FACSCanto™ II flow  
448 cytometer (BD BioSciences) and analyzed with FlowJo Software (Tree Star). Cell sorting was  
449 performed with BD FACS-ARIATM II cell sorter (BD Biosciences).

450 After pre-selection in side scatter (SSC) *versus* forward scatter (FSC) dot plot to  
451 exclude debris and doublets, cardiac M $\phi$ s were identified as CD45<sup>+</sup>CD11b<sup>+</sup>F4/80<sup>+</sup> cells, ECs  
452 as CD45<sup>-</sup>CD31<sup>+</sup>PDGFR $\beta$ <sup>-</sup> cells, 'transitioning' cells as CD45<sup>-</sup>CD31<sup>low</sup>PDGFR $\beta$ <sup>low</sup> cells, and  
453 VSMCs and MyoFBs as CD45<sup>-</sup>CD31<sup>-</sup>PDGFR $\beta$ <sup>+</sup> cells. Within the CD45<sup>+</sup>CD11b<sup>+</sup> cells, the  
454 F4/80<sup>+</sup>Ly6C<sup>low</sup> cardiac M $\phi$ s were sorted at 0, 7, and 28 days post-MI, whereas F4/80<sup>+</sup>Ly6C<sup>high</sup>  
455 cardiac M $\phi$ s were purified for 3 days post-MI.

456 Fluorescence minus one (FMO) controls were included during acquisition for gating  
457 analyses to distinguish positive from negative staining cell populations. The standardized  
458 median fluorescence intensity (MFI) of TGF $\beta$ 1, LAP and pSMAD2 for each cardiac cell type  
459 was calculated as previously described (Maecker et al., 2004):

$$460 \quad \text{Standardized MFI} = \frac{(\text{median}_{\text{positive}} - \text{median}_{\text{FMO}})}{2 * \text{SD}_{\text{FMO}}}$$

461 Whereas  $\text{median}_{\text{positive}}$  is the median intensity of the positive cell population,  $\text{median}_{\text{FMO}}$   
462 is the median intensity of the FMO, and  $\text{SD}_{\text{FMO}}$  is the standard deviation of the intensity of the  
463 FMO.

#### 464 List of antibodies used for flow cytometry

| Antibody                        | Concentration | Provider       | Reference |
|---------------------------------|---------------|----------------|-----------|
| CD16/CD32 Rat Anti-Mouse        | 1:100         | BD Biosciences | 553141    |
| CD45-PerCP/Cy5.5 Rat Anti-Mouse | 1:100         | Biologend      | 103132    |
| CD45-APC/Cy7 Rat Anti-Mouse     | 1:100         | Biologend      | 103116    |
| CD45-eFluor 450 Rat Anti-Mouse  | 1:100         | eBioscience    | 48-0451   |
| CD11b-PE-Cy7 Rat Anti-Mouse     | 1:100         | BD Biosciences | 552850    |

|                                                  |       |                         |             |
|--------------------------------------------------|-------|-------------------------|-------------|
| CD11b-Biotin Anti-Mouse                          | 1:100 | BD Biosciences          | 51-017125   |
| CD11b-FITC Rat Anti-Mouse                        | 1:100 | Biolegend               | 101206      |
| Ly6C-APC Rat Anti-Mouse                          | 2:100 | BD Biosciences          | 560595      |
| Ly6C-FITC Rat Anti-Mouse                         | 1:100 | AbD Serotec             | 553104      |
| CD31-APC Rat Anti-Mouse                          | 1:100 | BD Biosciences          | 551262      |
| CD31-FITC Rat Anti-Mouse                         | 1:100 | BD Biosciences          | 553372      |
| PDGFR- $\beta$ -PE Rat Anti-Mouse                | 2:100 | BioLegend               | 136005      |
| PDGFR- $\beta$ -APC Rat Anti-Mouse               | 2:100 | BioLegend               | 136007      |
| MEFSK4-PE Rat Anti-Mouse                         | 2:100 | Miltenyi                | 130-120-166 |
| MEFSK4-APC Rat Anti-Mouse                        | 2:100 | Miltenyi                | 130-120-802 |
| F4/80-PE/Cy7 Rat Anti-Mouse                      | 3:100 | BioLegend               | 123114      |
| F4/80-PE Rat Anti-Mouse                          | 3:100 | BioLegend               | 123110      |
| Phospho-Smad2 (Ser245/250/255) Rabbit Anti-Mouse | 1:100 | Cell Signaling          | 3104        |
| Streptavidin-Alexa 488 conjugate                 | 1:500 | ThermoFisher Scientific | S11223      |
| LAP-APC Mouse Anti-Mouse                         | 3:100 | Biolegend               | 141405      |
| TGF $\beta$ 1 Rabbit Anti-Mouse                  | 1:100 | Abcam                   | ab92486     |
| Chicken anti-Rabbit Alexa 488                    | 1:500 | ThermoFisher            | A-21441     |
| Goat anti-Rabbit Alexa 647                       | 1:500 | ThermoFisher            | A-21245     |

#### 465 RNA isolation and quantitative real-time PCR (q-PCR)

466 Cells were lysed with TRIzol Reagent (Ambion) for RNA isolation. Total RNA was  
 467 isolated from at least 3 independent biological replicates, and RNA quality and quantity  
 468 measured using the NanoDrop ND100 (Thermo Scientific). Total RNA was reverse-  
 469 transcribed to cDNA using the High Capacity cDNA Reverse Transcription Kit (Applied  
 470 Biosystems). qPCR analysis was performed using Sybr Green probes in the AB7900 FAST  
 471 384 Detection System (Applied Biosystems), according to the manufacturer's instructions.  
 472 Gene expression values were normalized to the housekeeping genes *36b4* and *Cyclophilin*,  
 473 and expressed as relative mRNA level. Data were analyzed by qBASE program (Biogazelle)  
 474 obtaining the Ct of the amplification products.

#### 475 List of primer sequences used for qPCR assays

| Gene               | Sequence Forward Primer | Sequence Reverse Primer |
|--------------------|-------------------------|-------------------------|
| <i>36b4</i>        | GCGACCTGGAAGTCCAATA     | ATCTGCTGCATCTGCTTGG     |
| <i>Cyclophilin</i> | ACAGGTCCTGGCATCTTGTC    | CATGGCTTCCACAATGTTCA    |

|               |                        |                      |
|---------------|------------------------|----------------------|
| <i>Mmp14</i>  | CCCTTTTACCAGTGGATGGA   | TGTCAAAGTTCCCGTCACAG |
| <i>Mmp2</i>   | GTCGCCCTAAAACAGACAA    | GGTCTCGATGGTGTCTGGT  |
| <i>Mmp13</i>  | ATCCTGGCCACCTTCTTCTT   | TTTCTCGGAGCCTGTCAACT |
| <i>Mmp9</i>   | CGTCGTGATCCCCACTTACT   | AACACACAGGGTTTGCCTTC |
| <i>Col1a1</i> | GCTTCAGTGGTTTGGATGGT   | AGGGCGACCTCTCTCACC   |
| <i>Pecam</i>  | TGCACAGTGATGCTGAACAA   | CCATGAGCACAAAGTTCTCG |
| <i>Kdr</i>    | GATCACCATTTCATCGCCTCT  | CCCAGGAAATTCTGTTTCCA |
| <i>Col4a2</i> | CAGGATTCCAAGGTGCTCAT   | CTGGAAGGCCTCTCATTGAA |
| <i>Tagln</i>  | GATGGAACAGGTGGCTCAAT   | AACTGCCCAAAGCCATTAGA |
| <i>Acta2</i>  | GAAAATGAGATGGCCACGGC   | TAGGTGGTTTCGTGGATGCC |
| <i>Pai1</i>   | GTAGCACAGGCACTGCAAAA   | GCCGAACCACAAAGAGAAAG |
| <i>Cdh5</i>   | CAGGGAATGTGCTTGCCTAT   | TCACACGGATGACAGAGGTC |
| <i>Tie2</i>   | CCTTCACCAGGCTGATTGTT   | ATAAACCAGGAGGGAAAT   |
| <i>Cdh2</i>   | GCCATCATCGCTATCCTTCT   | TTAAAAGCTGCTTGGCTTGG |
| <i>Col1a2</i> | CCAGCGAAGAACTCATAACAGC | GGACACCCCTTCTACGTTGT |
| <i>Col3a1</i> | CGTAAGCACTGGTGGACAGA   | AGCTGCACATCAACGACATC |
| <i>Zeb2</i>   | GAAAAGCAGTTCCCTTCTGC   | AGCCTCGAGTGCTCGATAAG |
| <i>Snai1</i>  | TGGAAAGGCCTTCTCTAGGC   | CTTCACATCCGAGTGGGTTT |

## 476 **Histology and immunohistochemistry**

477 For histological analysis, hearts were perfused with cold PBS, fixed in 4% PFA  
 478 overnight and embedded in paraffin. Transverse sections (5 µm) were stained with  
 479 hematoxylin-eosin (H&E) and Masson trichrome stain according to standard procedures.

480 For immune-labelling of arterioles, samples were stained with anti-SMA, afterwards  
 481 with appropriate HRP conjugated antibody, and finally revealed with 3,3'-Diaminobenzidine  
 482 (DAB) following standard protocols. Whole slide images were acquired with a digital slide  
 483 scanner (Hamamatsu, Nanozoomer-RS C110730) and then visualized, and exported to TIFF  
 484 images using NDP.view2 software (Hamamatsu Photonics).

485 Manual and automated quantifications were performed with Fiji Image J Software (NIH,  
 486 <https://imagej.nih.gov/ij/>). The infarct zone (IZ), and the remote zone (RZ) were defined on the  
 487 basis of H&E-stained sections. In particular, areas containing dying or dead cardiomyocytes  
 488 (picnotic or absent nuclei, wavy fibers) or fibrotic areas were defined as IZ, whilst the RZ was  
 489 considered the healthy LV free wall. Measurements were performed on sections obtained from  
 490 the midpoint of the infarct.

## 491 **Multi-Photon microscopy and Second Harmonic Generation Imaging**



492 Collagen fibers were visualized in H&E-stained heart sections with a Zeiss LSM 780  
493 microscope coupled to a Spectra-Physics Mai Tai DS [pulse<70 ps] laser, by second harmonic  
494 generation (SHG) and multi-photon excitation fluorescence (MPEF) microscopy imaging  
495 technique (Abraham et al., 2010). Optical sections were acquired every 3  $\mu\text{m}$  (25x objective)  
496 and stitched using Zeiss Zen2 software. The images were then stacked and flattened with  
497 Image J software to create maximum intensity Z-projections. Collagen density was calculated  
498 using a simple threshold pixel counting method within the IZ and expressed as the area  
499 fraction (% SHG). Skewness (asymmetry of pixel distribution) and kurtosis (gray-tone spread-  
500 out distribution) were assessed as an indicative of fiber arrangement (Mostaço-Guidolin et al.,  
501 2013).

### 502 **Tissue immunofluorescence and confocal microscopy**

503 Transverse paraffin sections (7  $\mu\text{m}$ ) of infarcted hearts were deparaffinized, rehydrated  
504 and finally washed in PBS 5 minutes twice. Antigen retrieval was performed by means of pH  
505 = 6 citrate buffer for 20 minutes in the microwave at maximum intensity. Afterwards, sections  
506 were cooled down at room temperature (RT) for 1 h 30 minutes and then washed with PBS 5  
507 minutes twice. Sections were blocked for 1 h at RT (0.3% Triton X-100, 5% goat serum and  
508 5% BSA in PBS) and primary antibodies were incubated O/N at 4° C (0.3% Triton X-100, 2.5%  
509 goat serum and 2.5% BSA in PBS). Next, sections were washed with 0.1% Triton X-100 in  
510 PBS at RT for 10 minutes three times and secondary antibodies and DAPI (1/5000) for nuclear  
511 staining were then incubated for 1 h 30 minutes at RT (0.3% Triton X-100, 2.5% goat serum  
512 and 2.5% BSA in PBS). After four washing steps with 0.1% Triton X-100 in PBS at RT for 10  
513 minutes plus 10 minutes more with PBS alone, slides were mounted with Fluoromont-G (0100-  
514 01, Southern Biotech). Images were acquired with a Nikon A1R confocal microscope with  
515 sections every 1.5  $\mu\text{m}$ . Three to four areas were acquired within the IZ (the two most distal  
516 edges and the center of the infarcted area), and other three to four within the RZ (LV free wall  
517 most distal to the infarct).

518 For the *in vivo* EndMT identification, transverse paraffin thick sections (14  $\mu\text{m}$ ) of 7  
519 day-post-infarcted hearts were sequentially stained. For sequential immunostaining, primary  
520 rabbit pSMAD2 was incubated O/N at 4°C (0.3% Triton X-100, 2.5% goat serum and 2.5%  
521 BSA in PBS). After washing, goat anti-rabbit Alexa 488 was incubated 1 h at RT (0.3% Triton  
522 X-100, 2.5% goat serum and 2.5% BSA in PBS). Sections were afterwards thoroughly  
523 washed, and additional blocking was performed with 0.3% Triton X-100, 5% rabbit serum and  
524 5% BSA in PBS 1 h at RT. Directly labelled primary antibodies (mouse anti-SMA-Cy3 and  
525 rabbit anti-ERG-647) and DAPI were then incubated 1 hour at RT. Finally, sections were  
526 washed and mounted as indicated before. Visual co-localization of the three markers (ERG,  
527 SMA, and pSMAD2,) was performed with the orthogonal view plug-in of ImageJ.

528 For CA-IX quantifications, the total area covered by the CA-IX signal in every image  
529 was normalized by the total area, and this ratio was averaged in between individuals. For  
530 pSMAD2 quantification in VSMCs and MyoFBs, DAPI nuclei within arteriolar SMA signal were  
531 considered VSMCs and DAPI nuclei in non-arteriolar SMA signal were considered MyoFBs.  
532 The number of DAPI<sup>+</sup>pSMAD2<sup>+</sup> VSMCs and the number of DAPI<sup>+</sup>pSMAD2<sup>+</sup> MyoFBs were  
533 normalized by the total number of VSMCs or MyoFBs, respectively, and expressed as  
534 percentage. Finally, percentages obtained in each region were averaged within individuals.  
535 Measurements were performed on sections obtained from the midpoint of the infarct.

### 536 List of antibodies used for immunofluorescence assay

| Antibody                   | Concentration | Provider       | Reference |
|----------------------------|---------------|----------------|-----------|
| Rabbit anti-CAI-IX         | 1:100         | Abcam          | ab15086   |
| Goat anti-Rabbit Alexa 546 | 1:500         | ThermoFisher   | A-11035   |
| Rat anti-CD31              | 1:200         | Dianova        | DIA-310   |
| Goat anti-Rat Alexa 488    | 1:500         | ThermoFisher   | A-11006   |
| Rabbit anti-pSMAD2         | 1:100         | Cell Signaling | 3108      |
| Goat anti-Rabbit Alexa 647 | 1:500         | ThermoFisher   | A-21245   |
| Mouse anti-SMA-Cy3         | 1:400         | Sigma-Aldrich  | C6198     |
| Rabbit anti-ERG Alexa 647  | 1:100         | Abcam          | ab196149  |

### 537 3D fully automated microvasculature image analysis

538 Transverse paraffin sections (15  $\mu$ m) of infarcted hearts were stained with anti-CD31  
539 and anti-SMA antibodies and DAPI for nuclear staining. Two to four images were acquired  
540 within the IZ (including the two most distal edges and the center of the IZ) per mouse with a  
541 Nikon A1R confocal microscope. Thus, 38 3D images were quantified. Characterization of the  
542 microvasculature was performed by means of a fully automated pipeline (Gkontra et al.,  
543 2018a). Modules of the pipeline were adapted as previously described (Zak et al., 2019) in  
544 order to account for the different animal model (mouse) as well as the use of the relatively thin  
545 tissue sections compared to the thick tissue sections of  $\sim$ 100  $\mu$ m used in the original work.  
546 Moreover, since images included both tissue areas and areas belonging to the microscope  
547 slide, it was necessary to separate the tissue volume from the background glass area. For this  
548 purpose, firstly the images were denoised by means of non-local means filtering (Buades et  
549 al., 2005). Subsequently, 3D tissue segmentation was performed by applying Otsu multi-level  
550 thresholding technique (Otsu, 1979) on the nuclei channel. It should be noted that the intensity  
551 levels used for thresholding varied between three and four depending on the image and they  
552 were automatically defined. Voxels of all intensities levels but the lower one were considered

553 to belong to the tissue. Lastly, holes within the segmented area were automatically identified  
554 and filled. It should be noted that apart from normalization purposes, the tissue mask was  
555 used to exclude from the corresponding segmentation mask of vessels and SMA<sup>+</sup> cells non-  
556 tissue voxels that were incorrectly identified as belonging to vessels or SMA respectively. To  
557 this end, element-wise multiplications of the segmentations of vessels and SMA<sup>+</sup> cells with the  
558 tissue mask were performed.

559 Following tissue segmentation, we applied modules of the pipeline that permit the  
560 automatic segmentation of nuclei, vessels and SMA<sup>+</sup> cells from the corresponding image  
561 channels. Classification of microvessels according to their size and relation with SMA<sup>+</sup> cells  
562 into different physiologically meaningful categories was performed as previously described  
563 (Zak et al., 2019). Lastly, quantitative parameters regarding the morphology and  
564 angioarchitecture of the network as well as the relation of vessels with SMA<sup>+</sup> cells were  
565 extracted. The parameters are summarized in Table 3.

## 566 **Cell culture**

567 *Bone marrow-derived macrophages (BMDMs):* BMDMs were harvested from 8-10-  
568 week-old MT1-MMP<sup>fl/fl</sup> and MT1-MMP<sup>ΔLysM</sup> mice by flushing femurs and tibias with PBS. Cells  
569 were filter through a 100 μm nylon cell strainer (Falcon) and cultured in RPMI (Lonza)  
570 supplemented with 20% L929-cell conditioned medium, 10% FBS (Gibco), 1% P/S (Lonza),  
571 and 1 mM L-Gln (Lonza) in sterile non-tissue culture treated 10 cm petri dish. BMDMs were  
572 activated with 50 ng/ml LPS (Peptotech) O/N to stimulate TGFβ1 production.

573 *Mouse aortic endothelial cells (MAECs):* Six to eight aortas from 4-week-old male  
574 C57BL/6 mice were pooled to obtain a single-cell suspension (Fogelstrand et al., 2009).  
575 Briefly, after carefully aorta dissection and fat removal under a microscope, aortas were  
576 incubated in collagenase type I solution (3.33 mg/ml, Worthington) for 5 minutes at 37 °C.  
577 Then, adventitia was removed with forceps, the aortas were then cut into small pieces (1-2  
578 mm) and incubated for 45 minutes at 37 °C in a type I collagenase (6 mg/ml, Worthington) and  
579 elastase (2.5 mg/ml, Worthington) solution DMEM (Lonza) solution. The obtained single cell  
580 suspension was plated on 0.5%-gelatin-coated plates in DMEM/F12 supplemented with 20%  
581 FBS, 2 mM L-Gln, 1% P/S, and ECGS/H. When culture became confluent, MAECs were  
582 positively selected with an antibody against intercellular adhesion molecule 2 (anti-ICAM2;  
583 553325 BD Biosciences) coupled to magnetic beads (Dynabeads™ Sheep Anti-Rat IgG,  
584 ThermoFisher), and cultured as indicated in M199 supplemented with 20% FBS, 1% P/S, 2mM  
585 L-Gln 1% HEPES, and ECGS/H (Koziol et al., 2012).

586 *Human embryonic kidney 293 (HEK293) cells:* HEK293 cells (Lonza) were cultured in  
587 DMEM (Lonza) with 10% FBS.

588 *Cardiac Mφs*: FACS-sorted Mφs (CD45<sup>+</sup>CD11b<sup>+</sup>F4/80<sup>+</sup>Ly6C<sup>low</sup> cells) were purified  
589 from MT1-MMP<sup>ff</sup> and MT1-MMP<sup>ΔLysM</sup> hearts on day 7 after MI. They were cultured in DMEM  
590 10% FBS 10 ng/ml M-CSF (Peprotech).

#### 591 **Co-culture and immunofluorescence assay**

592 Mouse aortic ECs (MAECs) were plated at 20,000 per well on 0.5%-gelatin-coated  
593 optical p96-well plates in M199 supplemented with 20% FBS, 1% P/S, 2mM L-Gln, 1%  
594 HEPES, and ECGS/H, and allowed to attach for 6 h. The medium was then removed and  
595 treatments were added in the same medium with reduced serum (5% FBS). The MAEC  
596 cultures were overlaid with 30,000 LPS-activated MT1-MMP<sup>ff</sup> or MT1-MMP<sup>ΔLysM</sup> BMDMs, or  
597 with 50,000 cardiac Mφs from 7-day post-MI MT1-MMP<sup>ff</sup> or MT1-MMP<sup>ΔLysM</sup> mice. Co-cultures  
598 were maintained for 4 days. As a positive control for EndMT, MAEC monocultures were  
599 treated with 10 ng/ml TGFβ1.

600 After two washes in HBBS, cultures were fixed for 10 minutes at room temperature  
601 (RT) in 4% paraformaldehyde. Cells were then permeabilized for 10 minutes at RT in 0.2%  
602 Triton X-100 in phosphate-buffered saline (PBS) and blocked for 1 h at RT in 5% goat serum  
603 and 5% BSA in PBS. After overnight incubation with primary antibodies at 4° C in 2.5% goat  
604 serum and 2.5% BSA in PBS, cells were washed three times with PBS at RT and then  
605 incubated with secondary antibodies and DAPI for 1 h 30 minutes at RT in 2.5% goat serum  
606 and 2.5% BSA in PBS. Cells were then washed four times with PBS. Cells were visualized  
607 under a Nikon A1R microscope, and images were acquired as 2x2 tile scans of 5x1 μm  
608 sections. Maximal projections were used for quantifications.

#### 609 **Co-cultures and qPCR assay**

610 MAECs were plated at 150,000 per well on 0.5%-gelatin-coated optical p6-well plates  
611 in M199 supplemented with 20% FBS, 1% P/S, 2mM L-Gln, 1% HEPES, and ECGS/H, and  
612 allowed to attach for 6 h. The medium was then removed and treatments were added in the  
613 same medium with reduced serum (5% FBS). The MAEC cultures were overlaid with 250,000  
614 LPS-activated MT1-MMP<sup>ff</sup> or MT1-MMP<sup>ΔLysM</sup> BMDMs. Co-cultures were maintained for 4  
615 days. As a positive control for EndMT, MAEC monocultures were treated with 10 ng/ml TGFβ1.  
616 Afterwards, cells were lysed with TRIzol Reagent (Ambion) for RNA isolation following  
617 manufacturer's instructions.

#### 618 **HEK293 transfection and luciferase assay**

619 HEK293 cells (40%-50% confluence) were transfected over 6 h with the plasmid p3TP-  
620 lux (Wrana et al., 1992) with 2.5M CaCl<sub>2</sub> in HEPES Buffered Saline (HBS). This plasmid

621 contains luciferase downstream of the PAI-1 promoter, therefore the luciferase activity is  
622 proportional to the production of bioactive TGF $\beta$ 1 (Abe et al., 1994).

623 Luciferase assay was carried out as described (Abe et al., 1994). In brief, transfected  
624 HEK293 cells were plated at a density of 30,000 cells per well in p96-well plates and allowed  
625 to adhere for 6 h. Then, 10 ng/mL of recombinant TGF $\beta$ 1 (Peprotech) for the positive control,  
626 40,000 MT1-MMP<sup>ff</sup> BMDMs or 40,000 MT1-MMP $\Delta$ LysM BMDMs (previously activated with 50  
627 ng/ml LPS O/N) were added to the plate. After 24 h of incubation, cells were lysed with Passive  
628 Lysis Buffer (Promega), and luciferase activity was assayed with the Promega Luciferase  
629 Assay according to manufacturer's instructions.

630 When the assay was carried out with cardiac M $\phi$ s, CD45<sup>+</sup>CD11b<sup>+</sup>F4/80<sup>+</sup>Ly6C<sup>low</sup> cells  
631 were sorted as indicated in Figure S1A-B from 7 days post-MI MT1-MMP<sup>ff</sup> or MT1-MMP $\Delta$ LysM  
632 hearts. 50,000 cardiac M $\phi$ s were added to the previously transfected and plated HEKs (as  
633 indicated above), and M-CSF (10 ng/ml) was kept in the medium for the 24 h of culture to  
634 maintain cardiac M $\phi$ s alive. Then, cells were lysed with Passive Lysis Buffer (Promega), and  
635 luciferase activity was assayed with the Promega Luciferase Assay according to  
636 manufacturer's instructions.

### 637 **Lentiviral transduction**

638 The full-length MT1-MMP sequence (FL) or mutated version to disable catalytic activity  
639 (E240A) were cloned into the SFFV-IRESGFP lentiviral backbone. Lentiviruses expressing  
640 Mock, MT1-MMP FL, or MT1-MMP E240A were prepared and titered as previously described  
641 (Esteban et al., 2019). For viral inoculation, we incubated MT1-MMP $\Delta$ LysM BMDMs with the  
642 viral supernatants (MOI = 10) in RPMI supplemented with 20% L929-cell conditioned medium,  
643 10% FBS, 1% P/S, and 1mM L-Gln for 48 h. GFP signal was detected by fluorescent  
644 microscopy in transduced BMDMs. We then removed the viral supernatants and stimulated  
645 the cells with 50 ng/ml LPS O/N. Afterwards, the media was removed and cells were cultured  
646 in DMEM 10% FBS for 24 h to obtain conditioned media. Conditioned media was then added  
647 to HEK293 cells for luciferase assay as described above.

### 648 **Cell extract preparation and Western blot analysis**

649 MT1-MMP<sup>ff</sup> or MT1-MMP $\Delta$ LysM BMDMs were treated with 1 ng/mL LPS (Peprotech) for  
650 24 h to stimulate TGF $\beta$ 1 production. Prior to lysate collection, cell viability was determined by  
651 microscopy under bright field and cell debris removed by 2 washes of monolayers with PBS.  
652 For preparation of total lysates, 4x10<sup>6</sup> BMDMs were incubated in RIPA buffer, containing 50  
653 mM Tris-HCl, pH 8; 150 mM NaCl; 1% Triton X-100; 0.5% sodium deoxycholate; 0.1% SDS;  
654 1mM PMSF (Sigma) and a protease and phosphatase inhibitor cocktail (Sigma), for 30  
655 minutes at 4<sup>o</sup> C in the rotor. The lysate was centrifuged (14,000 g, 10 minutes), and the

656 supernatant containing the proteins was transferred to a new tube. For subcellular fractioning,  
657  $4 \times 10^6$  BMDMs were incubated in HES buffer, containing 20mM HEPES, 1mM EDTA, 250mM  
658 sucrose and a protease and phosphatase inhibitor cocktail (Sigma), for 10 minutes at 4° C.  
659 Cells were lysed through a 22G needle followed by a 25G needle, and centrifuged at 500 g  
660 for 8 minutes to pellet the unbroken cells. Then, the supernatant was transferred to an empty  
661 tube and centrifuged at 10,000 g for 12 minutes to separate the cytosolic (supernatant) and  
662 the membrane (pellet) protein fractions.

663 Protein concentration was estimated using Bradford Assay (Bio-Rad) and 30 µg of total protein  
664 were separated by 10% SDS-PAGE and transferred to a nitrocellulose membrane (Bio-Rad).  
665 Correct protein loading was confirmed by Ponceau staining. Membranes were incubated O/N  
666 with antibodies against TGFβ1 (Santa Cruz, sc-146), TfR (Abcam; ab84036), and α-tubulin  
667 (Sigma; T6074) at 1:500 (for TGFβ1) or 1:1000 dilutions (for TfR and α-tubulin), and then  
668 thoroughly washed and incubated with HRP-conjugated anti-rabbit (Jackson 111-035-003) or  
669 anti-mouse (Jackson 115-035-003) antibodies (1:7500). Blots were visualized using the  
670 chemiluminescent Immobilon Classico Western HRP substrate (Millipore). Chemiluminiscent  
671 signal was detected using ImageQuant™ LAS 4000 and densitometry analysis performed  
672 using ImageJ. The ratio between proteins of interest (TGFβ1) and endogenous control (TfR)  
673 was calculated for data normalization. Graphs represent fold change calculated based on  
674 normalized data.

## 675 **Statistics**

676 Data are presented as mean ± SEM. Unpaired *t*-test was used when two groups were  
677 compared, and comparison of more than two datasets was done using one-way analysis of  
678 variance (ANOVA) with Tukey's post-test. Comparisons of two-time curves were performed  
679 using two-way ANOVA followed by Tukey's post-test. All statistical analyses were performed  
680 using Prism v7 (GraphPad Software, California, USA). Differences were considered significant  
681 when  $p < 0.05$ , and represented as \*  $p < 0.05$ , \*\*  $p < 0.01$ , \*\*\*  $p < 0.001$ , and \*\*\*\*  $p < 0.0001$ .

## 682 **ACKNOWLEDGMENTS**

683 We thank Ángel Colmenar and the CNIC Cellomics, Proteomics, Microscopy,  
684 Advanced Imaging, and Animal Units for technical support and Simon Bartlett for English  
685 editing. We also thank the Proteomics Unit at the Vall d'Hebron Institute of Oncology. We  
686 thank Carlos López-Otín (Universidad de Oviedo) for providing the MT1-MMP1<sup>fl/fl</sup> mice, Ralf  
687 Adams (Max Planck Institute of Molecular Biomedicine) for providing the Cdh5-Cre<sup>ERT2</sup> mice,  
688 and Carmelo Bernabeu (Centro de Investigaciones Biológicas, CIB-CSIC) for the p3TP-lux  
689 plasmid. This study was supported by grants from the Spanish Ministry of Science, Innovation  
690 and Universities (SAF2017-90604-REDT-NurCaMein, RTI2018-095928-BI00 to M.R.;

691 SAF2017-83229-R to A.G.A.), Comunidad de Madrid (MOIR-B2017/BMD-3684) to M.R, and  
692 La Marató de TV3 Foundation to D.G.D, A.G.A., and M.R.. L.A.H. is funded by a fellowship  
693 from La Caixa-CNIC. A.S.E. is funded by a fellowship from La Caixa and supported by La  
694 Residencia de Estudiantes. The CNIC is supported by the MCNU and the Pro CNIC  
695 Foundation and is a Severo Ochoa Center of Excellence (SEV-2015-0505).

## 696 **COMPETING INTERESTS**

697 The authors declare no competing interests.

## 698 **REFERENCES**

- 699 Abe, M., Harpel, J.G., Metz, C.N., Nunes, I., Loskutoff, D.J., and Rifkin, D.B. (1994). An assay  
700 for transforming growth factor-beta using cells transfected with a plasminogen activator  
701 inhibitor-1 promoter-luciferase construct. *Anal Biochem* 216, 276-284.
- 702 Abraham, T., Carthy, J., and McManus, B. (2010). Collagen matrix remodeling in 3-  
703 dimensional cellular space resolved using second harmonic generation and multiphoton  
704 excitation fluorescence. *Journal of structural biology* 169, 36-44.
- 705 Abram, C.L., Roberge, G.L., Hu, Y., and Lowell, C.A. (2014). Comparative analysis of the  
706 efficiency and specificity of myeloid-Cre deleting strains using ROSA-EYFP reporter mice. *J*  
707 *Immunol Methods* 408, 89-100.
- 708 Aisagbonhi, O., Rai, M., Ryzhov, S., Atria, N., Feoktistov, I., and Hatzopoulos, A.K. (2011).  
709 Experimental myocardial infarction triggers canonical Wnt signaling and endothelial-to-  
710 mesenchymal transition. *Dis Model Mech* 4, 469-483.
- 711 Alonso-Herranz, L., Porcuna, J., and Ricote, M. (2019). Isolation and Purification of Tissue  
712 Resident Macrophages for the Analysis of Nuclear Receptor Activity. *Methods in molecular*  
713 *biology* (Clifton, NJ) 1951, 59-73.
- 714 Arnold, T.D., Niaudet, C., Pang, M.F., Siegenthaler, J., Gaengel, K., Jung, B., Ferrero, G.M.,  
715 Mukoyama, Y.S., Fuxe, J., Akhurst, R., *et al.* (2014). Excessive vascular sprouting underlies  
716 cerebral hemorrhage in mice lacking alphaVbeta8-TGFbeta signaling in the brain.  
717 *Development* 141, 4489-4499.
- 718 Bajpai, G., Bredemeyer, A., Li, W., Zaitsev, K., Koenig, A.L., Lokshina, I., Mohan, J., Ivey, B.,  
719 Hsiao, H.M., Weinheimer, C., *et al.* (2019). Tissue Resident CCR2- and CCR2+ Cardiac  
720 Macrophages Differentially Orchestrate Monocyte Recruitment and Fate Specification  
721 Following Myocardial Injury. *Circulation research* 124, 263-278.
- 722 Benjamin, E.J., Blaha, M.J., Chiuve, S.E., Cushman, M., Das, S.R., Deo, R., de Ferranti, S.D.,  
723 Floyd, J., Fornage, M., Gillespie, C., *et al.* (2017). Heart Disease and Stroke Statistics-2017  
724 Update: A Report From the American Heart Association. *Circulation* 135, e146-e603.

- 725 Buades, A., Coll, B., and Morel, J.-M. (2005). A Non-Local Algorithm for Image Denoising. In  
726 Proceedings of the 2005 IEEE Computer Society Conference on Computer Vision and Pattern  
727 Recognition (CVPR'05) - Volume 2 - Volume 02 (IEEE Computer Society), pp. 60-65.
- 728 Clausen, B.E., Burkhardt, C., Reith, W., Renkawitz, R., and Forster, I. (1999). Conditional  
729 gene targeting in macrophages and granulocytes using LysMcre mice. *Transgenic research*  
730 *8*, 265-277.
- 731 Creemers, E.E., Cleutjens, J.P., Smits, J.F., and Daemen, M.J. (2001). Matrix  
732 metalloproteinase inhibition after myocardial infarction: a new approach to prevent heart  
733 failure? *Circulation research* *89*, 201-210.
- 734 Cruz-Adalia, A., Jimenez-Borreguero, L.J., Ramirez-Huesca, M., Chico-Calero, I., Barreiro,  
735 O., Lopez-Conesa, E., Fresno, M., Sanchez-Madrid, F., and Martin, P. (2010). CD69 limits the  
736 severity of cardiomyopathy after autoimmune myocarditis. *Circulation* *122*, 1396-1404.
- 737 Daseke, M.J., 2nd, Valerio, F.M., Kalusche, W.J., Ma, Y., DeLeon-Pennell, K.Y., and Lindsey,  
738 M.L. (2019). Neutrophil proteome shifts over the myocardial infarction time continuum. *Basic*  
739 *Res Cardiol* *114*, 37.
- 740 Dick, S.A., Macklin, J.A., Nejat, S., Momen, A., Clemente-Casares, X., Althagafi, M.G., Chen,  
741 J., Kantores, C., Hosseinzadeh, S., Aronoff, L., *et al.* (2019). Self-renewing resident cardiac  
742 macrophages limit adverse remodeling following myocardial infarction. *Nat Immunol* *20*, 29-  
743 39.
- 744 Esteban, S., Clemente, C., Koziol, A., Gonzalo, P., Rius, C., Martinez, F., Linares, P.M.,  
745 Chaparro, M., Urzainqui, A., Andres, V., *et al.* (2019). Endothelial MT1-MMP targeting limits  
746 intussusceptive angiogenesis and colitis via TSP1/nitric oxide axis. *EMBO molecular*  
747 *medicine*, e10862.
- 748 Evrard, S.M., Lecce, L., Michelis, K.C., Nomura-Kitabayashi, A., Pandey, G., Purushothaman,  
749 K.R., d'Escamard, V., Li, J.R., Hadri, L., Fujitani, K., *et al.* (2016). Endothelial to mesenchymal  
750 transition is common in atherosclerotic lesions and is associated with plaque instability. *Nat*  
751 *Commun* *7*, 11853.
- 752 Fogelstrand, P., Feral, C.C., Zargham, R., and Ginsberg, M.H. (2009). Dependence of  
753 proliferative vascular smooth muscle cells on CD98hc (4F2hc, SLC3A2). *J Exp Med* *206*,  
754 2397-2406.
- 755 Frangogiannis, N.G. (2015). Pathophysiology of Myocardial Infarction. *Compr Physiol* *5*, 1841-  
756 1875.
- 757 Frangogiannis, N.G. (2020). Transforming growth factor- $\beta$  in tissue fibrosis *Journal of*  
758 *Experimental Medicine* *217*, 16.



- 759 Gallego-Colon, E., Villalba, M., Tonkin, J., Cruz, F., Bernal, J.A., Jimenez-Borregureo, L.J.,  
760 Schneider, M.D., Lara-Pezzi, E., and Rosenthal, N. (2016). Intravenous delivery of adeno-  
761 associated virus 9-encoded IGF-1Ea propeptide improves post-infarct cardiac remodelling.  
762 NPJ Regenerative medicine 1, 16001.
- 763 Garmon, T., Wittling, M., and Nie, S. (2018). MMP14 Regulates Cranial Neural Crest  
764 Epithelial-to-Mesenchymal Transition and Migration. Dev Dyn 247, 1083-1092.
- 765 Gkontra, P., Norton, K.A., Zak, M.M., Clemente, C., Agüero, J., Ibanez, B., Santos, A., Popel,  
766 A.S., and Arroyo, A.G. (2018a). Deciphering microvascular changes after myocardial  
767 infarction through 3D fully automated image analysis. Sci Rep 8, 1854.
- 768 Gkontra, P., Norton, K.A., Zak, M.M., Clemente, C., Agüero, J., Ibanez, B., Santos, A., Popel,  
769 A.S., and Arroyo, A.G. (2018b). Deciphering microvascular changes after myocardial  
770 infarction through 3D fully automated image analysis. Scientific reports 8, 018-19758.
- 771 Gutierrez-Fernandez, A., Soria-Valles, C., Osorio, F.G., Gutierrez-Abril, J., Garabaya, C.,  
772 Aguirre, A., Fueyo, A., Fernandez-Garcia, M.S., Puente, X.S., and Lopez-Otin, C. (2015). Loss  
773 of MT1-MMP causes cell senescence and nuclear defects which can be reversed by retinoic  
774 acid. Embo J 34, 1875-1888.
- 775 Helmke, A., Casper, J., Nordlohne, J., David, S., Haller, H., Zeisberg, E.M., and von  
776 Vietinghoff, S. (2019). Endothelial-to-mesenchymal transition shapes the atherosclerotic  
777 plaque and modulates macrophage function. Faseb j 33, 2278-2289.
- 778 Henderson, N.C., Arnold, T.D., Katamura, Y., Giacomini, M.M., Rodriguez, J.D., McCarty,  
779 J.H., Pellicoro, A., Raschperger, E., Betsholtz, C., Ruminiski, P.G., *et al.* (2013). Targeting of  
780 alphav integrin identifies a core molecular pathway that regulates fibrosis in several organs.  
781 Nature medicine 19, 1617-1624.
- 782 Hofmann, J.J., Briot, A., Enciso, J., Zovein, A.C., Ren, S., Zhang, Z.W., Radtke, F., Simons,  
783 M., Wang, Y., and Iruela-Arispe, M.L. (2012). Endothelial deletion of murine *Jag1*  
784 leads to valve calcification and congenital heart defects associated with Alagille syndrome.  
785 Development 139, 4449-4460.
- 786 Hudson, M.P., Armstrong, P.W., Ruzyllo, W., Brum, J., Cusmano, L., Krzeski, P., Lyon, R.,  
787 Quinones, M., Theroux, P., Sydłowski, D., *et al.* (2006). Effects of selective matrix  
788 metalloproteinase inhibitor (PG-116800) to prevent ventricular remodeling after myocardial  
789 infarction: results of the PREMIER (Prevention of Myocardial Infarction Early Remodeling)  
790 trial. J Am Coll Cardiol 48, 15-20.
- 791 Imaizumi, N., Monnier, Y., Hegi, M., Mirimanoff, R.O., and Ruegg, C. (2010). Radiotherapy  
792 suppresses angiogenesis in mice through TGF-betaRI/ALK5-dependent inhibition of  
793 endothelial cell sprouting. PLoS One 5, e11084.

794 Inserte, J., Aluja, D., Barba, I., Ruiz-Meana, M., Miro, E., Poncelas, M., Vilarrosa, U.,  
795 Castellano, J., and Garcia-Dorado, D. (2019). High-fat diet improves tolerance to myocardial  
796 ischemia by delaying normalization of intracellular PH at reperfusion. *J Mol Cell Cardiol* *133*,  
797 164-173.

798 Kanisicak, O., Khalil, H., Ivey, M.J., Karch, J., Maliken, B.D., Correll, R.N., Brody, M.J., SC,  
799 J.L., Aronow, B.J., Tallquist, M.D., *et al.* (2016). Genetic lineage tracing defines myofibroblast  
800 origin and function in the injured heart. *Nat Commun* *7*, 12260.

801 Koenig, G.C., Rowe, R.G., Day, S.M., Sabeh, F., Atkinson, J.J., Cooke, K.R., and Weiss, S.J.  
802 (2012). MT1-MMP-dependent remodeling of cardiac extracellular matrix structure and function  
803 following myocardial infarction. *The American journal of pathology* *180*, 1863-1878.

804 Kolk, M.V., Meyberg, D., Deuse, T., Tang-Quan, K.R., Robbins, R.C., Reichenspurner, H.,  
805 and Schrepfer, S. (2009). LAD-ligation: a murine model of myocardial infarction. *Journal of*  
806 *visualized experiments : JoVE*.

807 Kovacic, J.C., Dimmeler, S., Harvey, R.P., Finkel, T., Aikawa, E., Krenning, G., and Baker,  
808 A.H. (2019). Endothelial to Mesenchymal Transition in Cardiovascular Disease: JACC State-  
809 of-the-Art Review. *J Am Coll Cardiol* *73*, 190-209.

810 Koziol, A., Gonzalo, P., Mota, A., Pollan, A., Lorenzo, C., Colome, N., Montaner, D., Dopazo,  
811 J., Arribas, J., Canals, F., *et al.* (2012). The protease MT1-MMP drives a combinatorial  
812 proteolytic program in activated endothelial cells. *Faseb j* *26*, 4481-4494.

813 Krishnamurthy, P., Rajasingh, J., Lambers, E., Qin, G., Losordo, D.W., and Kishore, R. (2009).  
814 IL-10 inhibits inflammation and attenuates left ventricular remodeling after myocardial  
815 infarction via activation of STAT3 and suppression of HuR. *Circulation research* *104*, e9-18.

816 Lawrence, D.A. (2001). Latent-TGF-beta: an overview. *Mol Cell Biochem* *219*, 163-170.

817 Li, Y., Lui, K.O., and Zhou, B. (2018). Reassessing endothelial-to-mesenchymal transition in  
818 cardiovascular diseases. *Nat Rev Cardiol* *15*, 445-456.

819 Madisen, L., Zwingman, T.A., Sunkin, S.M., Oh, S.W., Zariwala, H.A., Gu, H., Ng, L.L.,  
820 Palmiter, R.D., Hawrylycz, M.J., Jones, A.R., *et al.* (2010). A robust and high-throughput Cre  
821 reporting and characterization system for the whole mouse brain. *Nat Neurosci* *13*, 133-140.

822 Maecker, H.T., Frey, T., Nomura, L.E., and Trotter, J. (2004). Selecting fluorochrome  
823 conjugates for maximum sensitivity. *Cytometry Part A* *62*, 169-173.

824 Moore-Morris, T., Guimaraes-Camboa, N., Banerjee, I., Zambon, A.C., Kisseleva, T.,  
825 Velayoudon, A., Stallcup, W.B., Gu, Y., Dalton, N.D., Cedenilla, M., *et al.* (2014). Resident  
826 fibroblast lineages mediate pressure overload-induced cardiac fibrosis. *The Journal of clinical*  
827 *investigation* *124*, 2921-2934.

828 Mostaço-Guidolin, L.B., Ko, A.C.T., Wang, F., Xiang, B., Hewko, M., Tian, G., Major, A.,  
829 Shiomi, M., and Sowa, M.G. (2013). Collagen morphology and texture analysis: from statistics  
830 to classification. *3*, 2190.

831 Mu, D., Cambier, S., Fjellbirkeland, L., Baron, J.L., Munger, J.S., Kawakatsu, H., Sheppard,  
832 D., Broaddus, V.C., and Nishimura, S.L. (2002). The integrin alpha(v)beta8 mediates epithelial  
833 homeostasis through MT1-MMP-dependent activation of TGF-beta1. *J Cell Biol 157*, 493-507.

834 Nahrendorf, M., Swirski, F.K., Aikawa, E., Stangenberg, L., Wurdinger, T., Figueiredo, J.L.,  
835 Libby, P., Weissleder, R., and Pittet, M.J. (2007). The healing myocardium sequentially  
836 mobilizes two monocyte subsets with divergent and complementary functions. *J Exp Med 204*,  
837 3037-3047.

838 Nguyen, H.L., Kadam, P., Helkin, A., Cao, K., Wu, S., Samara, G.J., Zhang, Q., Zucker, S.,  
839 and Cao, J. (2016). MT1-MMP Activation of TGF-beta Signaling Enables Intercellular  
840 Activation of an Epithelial-mesenchymal Transition Program in Cancer. *Curr Cancer Drug*  
841 *Targets 16*, 618-630.

842 O'Rourke, S.A., Dunne, A., and Monaghan, M.G. (2019). The Role of Macrophages in the  
843 Infarcted Myocardium: Orchestrators of ECM Remodeling. *Front Cardiovasc Med 6*, 101.

844 Ohuchi, E., Imai, K., Fujii, Y., Sato, H., Seiki, M., and Okada, Y. (1997). Membrane type 1  
845 matrix metalloproteinase digests interstitial collagens and other extracellular matrix  
846 macromolecules. *The Journal of biological chemistry 272*, 2446-2451.

847 Otsu, N. (1979). A Threshold Selection Method from Gray-Level Histograms. *IEEE*  
848 *Transactions on Systems, Man and Cybernetics 9*, 62-66.

849 Page-McCaw, A., Ewald, A.J., and Werb, Z. (2007). Matrix metalloproteinases and the  
850 regulation of tissue remodelling. *Nat Rev Mol Cell Biol 8*, 221-233.

851 Panizzi, P., Swirski, F.K., Figueiredo, J.L., Waterman, P., Sosnovik, D.E., Aikawa, E., Libby,  
852 P., Pittet, M., Weissleder, R., and Nahrendorf, M. (2010). Impaired infarct healing in  
853 atherosclerotic mice with Ly-6C(hi) monocytosis. *J Am Coll Cardiol 55*, 1629-1638.

854 Piera-Velazquez, S., and Jimenez, S.A. (2019). Endothelial to Mesenchymal Transition: Role  
855 in Physiology and in the Pathogenesis of Human Diseases. *Physiol Rev 99*, 1281-1324.

856 Pinto, A.R., Ilinykh, A., Ivey, M.J., Kuwabara, J.T., D'Antoni, M.L., Debuque, R., Chandran, A.,  
857 Wang, L., Arora, K., Rosenthal, N.A., *et al.* (2016). Revisiting Cardiac Cellular Composition.  
858 *Circulation research 118*, 400-409.

859 Ram, R., Mickelsen, D.M., Theodoropoulos, C., and Blaxall, B.C. (2011). New approaches in  
860 small animal echocardiography: imaging the sounds of silence. *American journal of physiology*  
861 *Heart and circulatory physiology 301*, H1765-1780.

- 862 Sato, H., Takino, T., Okada, Y., Cao, J., Shinagawa, A., Yamamoto, E., and Seiki, M. (1994).  
863 A matrix metalloproteinase expressed on the surface of invasive tumour cells. *Nature* 370, 61-  
864 65.
- 865 Spinale, F.G., Mukherjee, R., Zavadzkas, J.A., Koval, C.N., Bouges, S., Stroud, R.E.,  
866 Dobrucki, L.W., and Sinusas, A.J. (2010). Cardiac restricted overexpression of membrane  
867 type-1 matrix metalloproteinase causes adverse myocardial remodeling following myocardial  
868 infarction. *The Journal of biological chemistry* 285, 30316-30327.
- 869 Swirski, F.K., Nahrendorf, M., Etzrodt, M., Wildgruber, M., Cortez-Retamozo, V., Panizzi, P.,  
870 Figueiredo, J.L., Kohler, R.H., Chudnovskiy, A., Waterman, P., *et al.* (2009). Identification of  
871 splenic reservoir monocytes and their deployment to inflammatory sites. *Science* 325, 612-  
872 616.
- 873 Talmi-Frank, D., Altboum, Z., Solomonov, I., Udi, Y., Jaitin, D.A., Klepfish, M., David, E.,  
874 Zhuravlev, A., Keren-Shaul, H., Winter, D.R., *et al.* (2016). Extracellular Matrix Proteolysis by  
875 MT1-MMP Contributes to Influenza-Related Tissue Damage and Mortality. *Cell Host Microbe*  
876 20, 458-470.
- 877 van Amerongen, M.J., Harmsen, M.C., van Rooijen, N., Petersen, A.H., and van Luyn, M.J.  
878 (2007). Macrophage depletion impairs wound healing and increases left ventricular  
879 remodeling after myocardial injury in mice. *The American journal of pathology* 170, 818-829.
- 880 Walter, W., Alonso-Herranz, L., Trappetti, V., Crespo, I., Ibberson, M., Cedenilla, M.,  
881 Karaszewska, A., Nunez, V., Xenarios, I., Arroyo, A.G., *et al.* (2018). Deciphering the Dynamic  
882 Transcriptional and Post-transcriptional Networks of Macrophages in the Healthy Heart and  
883 after Myocardial Injury. *Cell reports* 23, 622-636.
- 884 Wang, Y., Nakayama, M., Pitulescu, M.E., Schmidt, T.S., Bochenek, M.L., Sakakibara, A.,  
885 Adams, S., Davy, A., Deutsch, U., Luthi, U., *et al.* (2010). Ephrin-B2 controls VEGF-induced  
886 angiogenesis and lymphangiogenesis. *Nature* 465, 483-486.
- 887 Wrana, J.L., Attisano, L., Carcamo, J., Zentella, A., Doody, J., Laiho, M., Wang, X.F., and  
888 Massague, J. (1992). TGF beta signals through a heteromeric protein kinase receptor  
889 complex. *Cell* 71, 1003-1014.
- 890 Xia, Y., Lee, K., Li, N., Corbett, D., Mendoza, L., and Frangogiannis, N.G. (2009).  
891 Characterization of the inflammatory and fibrotic response in a mouse model of cardiac  
892 pressure overload. *Histochem Cell Biol* 131, 471-481.
- 893 Xiong, Y., Zhang, J., Shi, L., Ning, Y., Zhu, Y., Chen, S., Yang, M., Chen, J., Zhou, G.W., and  
894 Li, Q. (2017). NOGO-B promotes EMT in lung fibrosis via MMP14 mediates free TGF-beta1  
895 formation. *Oncotarget* 8, 71024-71037.

896 Xu, X., Friehs, I., Hu, T.Z., Melnychenko, I., Tampe, B., Alnour, F., Iacone, M., Kalluri, R.,  
897 Zeisberg, M., Nido, P.J.d., *et al.* (2015). Endocardial Fibroelastosis Is Caused by Aberrant  
898 Endothelial to Mesenchymal Transition. *Circulation research* 116, 857-866.

899 Yabluchanskiy, A., Li, Y., Chilton, R.J., and Lindsey, M.L. (2013). Matrix metalloproteinases:  
900 drug targets for myocardial infarction. *Current drug targets* 14, 276-286.

901 Zak, M.M., Gkontra, P., Clemente, C., Squadrito, M.L., Ferrarini, A., Mota, R.A., Oliver, E.,  
902 Rocha, S., Agüero, J., Vazquez, J., *et al.* (2019). Sequential Bone-Marrow Cell Delivery of  
903 VEGFA/S1P Improves Vascularization and Limits Adverse Cardiac Remodeling After  
904 Myocardial Infarction in Mice. *Hum Gene Ther.*

905 Zavadzkas, J.A., Mukherjee, R., Rivers, W.T., Patel, R.K., Meyer, E.C., Black, L.E., McKinney,  
906 R.A., Oelsen, J.M., Stroud, R.E., and Spinale, F.G. (2011). Direct regulation of membrane  
907 type 1 matrix metalloproteinase following myocardial infarction causes changes in survival,  
908 cardiac function, and remodeling. *American journal of physiology Heart and circulatory*  
909 *physiology* 301, H1656-1666.

910 Zeisberg, E.M., Tarnavski, O., Zeisberg, M., Dorfman, A.L., McMullen, J.R., Gustafsson, E.,  
911 Chandraker, A., Yuan, X., Pu, W.T., Roberts, A.B., *et al.* (2007). Endothelial-to-mesenchymal  
912 transition contributes to cardiac fibrosis. *Nature medicine* 13, 952-961.

913 Zhang, Z., Wang, J.A., Xu, Y., Jiang, Z., Wu, R., Wang, L., Chen, P., Hu, X., and Yu, H. (2013).  
914 Menstrual blood derived mesenchymal cells ameliorate cardiac fibrosis via inhibition of  
915 endothelial to mesenchymal transition in myocardial infarction. *Int J Cardiol* 168, 1711-1714.

916

917 **TABLES**

|                | <b>MT1-MMP<sup>ff</sup></b> | <b>MT1-MMP<sup>ΔLysM</sup></b> |
|----------------|-----------------------------|--------------------------------|
| BW (g)         | 18.62 ± 2.00                | 19.53 ± 2.25                   |
| HW/BW (mg/g)   | 4.91 ± 0.28                 | 4.94 ± 0.19                    |
| HR (beats/min) | 462 ± 14                    | 463 ± 17                       |
| PR (ms)        | 39.82 ± 1.18                | 37.70 ± 1.21                   |
| QRS (ms)       | 25.41 ± 1.06                | 26.18 ± 0.88                   |
| LVEF (%)       | 53.52 ± 1.72                | 53.14 ± 2.31                   |
| LVVols (μL)    | 21.53 ± 1.36                | 19.98 ± 1.60                   |
| LVVold (μL)    | 25.26 ± 0.96                | 22.22 ± 0.90                   |
| FS (%)         | 26.58 ± 0.89                | 26.33 ± 1.51                   |
| LVIDs (mm)     | 3.67 ± 0.06                 | 3.54 ± 0.08                    |
| LVIDd (mm)     | 2.7 ± 0.06                  | 2.62 ± 0.10                    |

918

919 **Table 1. Mφ MT1-MMP deletion does not affect homeostatic cardiac function.**

920 Echocardiography and electrocardiography comparisons between 10-week-old MT1-MMP<sup>ff</sup>  
 921 and MT1-MMP<sup>ΔLysM</sup> mice. Data are means ± SEM of 10 mice per group. Unpaired *t*-test. BW,  
 922 body weight; FS, fraction shortening; HR, heart rate; HW, heart weight; LVEF, LV ejection  
 923 fraction; LVIDd, LV end-diastolic internal diameter; LVIDs, LV end-systolic internal diameter;  
 924 LVVold, LV end-diastolic volumen; LVVols, LV end-systolic volume.

925

|             | <b>MT1-MMP<sup>ff</sup></b> |                                   | <b>MT1-MMP<sup>ΔLysM</sup></b> |                                   |
|-------------|-----------------------------|-----------------------------------|--------------------------------|-----------------------------------|
|             | <b>%</b>                    | <b>cells (x10<sup>3</sup>)/ml</b> | <b>%</b>                       | <b>cells (x10<sup>3</sup>)/ml</b> |
| Neutrophils | 9.50 ± 0.98                 | 0.74 ± 0.11                       | 11.01 ± 1.43                   | 0.88 ± 0.13                       |
| Lymphocytes | 86.75 ± 1.29                | 6.97 ± 1.00                       | 84.79 ± 1.68                   | 6.84 ± 0.54                       |
| Monocytes   | 0.89 ± 0.14                 | 0.08 ± 0.02                       | 1.20 ± 0.13                    | 0.10 ± 0.01                       |
| Eosinophils | 2.45 ± 0.44                 | 0.21 ± 0.06                       | 2.48 ± 0.51                    | 0.20 ± 0.04                       |
| Basophils   | 0.41 ± 0.08                 | 0.03 ± 0.01                       | 0.53 ± 0.09                    | 0.05 ± 0.01                       |

926 **Table 2. M $\phi$  MT1-MMP deletion does not affect circulating bone-marrow derived**  
 927 **populations.** Hematograms from 10-week-old MT1-MMP<sup>fl/fl</sup> and MT1-MMP $\Delta$ LysM mice. Data are  
 928 means  $\pm$  SEM of 8 mice per group.

929

| Minkowski-Based Metrics                                                                             | MT1-MMP <sup>fl/fl</sup> | MT1-MMP $\Delta$ LysM |
|-----------------------------------------------------------------------------------------------------|--------------------------|-----------------------|
| Vascular Volume Density (%)                                                                         | 12.65 $\pm$ 0.36         | 13.26 $\pm$ 0.34 *    |
| Vascular Surface Area Density (x 10 <sup>-3</sup> ) ( $\mu$ m <sup>2</sup> / $\mu$ m <sup>3</sup> ) | 21.24 $\pm$ 2.5          | 23.13 $\pm$ 1.92      |

### Graph-Based Metrics

|                                                                                  |                    |                    |
|----------------------------------------------------------------------------------|--------------------|--------------------|
| Vascular Segment length ( $\mu$ m)                                               | 6.97 $\pm$ 0.74    | 6.2 $\pm$ 0.18     |
| Vascular Segment surface ( $\mu$ m <sup>2</sup> )                                | 36.41 $\pm$ 5.52   | 29.5 $\pm$ 1.6     |
| Vascular Segment volume ( $\mu$ m <sup>3</sup> )                                 | 17 $\pm$ 3.8       | 12.54 $\pm$ 1.53   |
| Tortuosity ( $\mu$ m/ $\mu$ m)                                                   | 1.61 $\pm$ 0.02    | 1.61 $\pm$ 0.03    |
| Vascular Segments (x 10 <sup>5</sup> ) <sup>a</sup>                              | 4.12 $\pm$ 0.68    | 5.48 $\pm$ 0.53    |
| Vascular Segments <sup>b</sup>                                                   | 144.17 $\pm$ 14.15 | 158.27 $\pm$ 2.31  |
| Vessels of diameter $\leq$ 3 ( $\mu$ m) (%)                                      | 95.48 $\pm$ 2.55   | 96.97 $\pm$ 1.85 * |
| Vessels of diameter between 3 and 6 ( $\mu$ m) (%)                               | 4.51 $\pm$ 2.52    | 3.03 $\pm$ 1.85    |
| Vessels of diameter > 6 ( $\mu$ m) (%)                                           | 0.012 $\pm$ 0.001  | 0.028 $\pm$ 0.001  |
| Vessels of diameter $\leq$ 3 ( $\mu$ m) (x 10 <sup>5</sup> ) <sup>a</sup>        | 3.97 $\pm$ 0.71    | 5.33 $\pm$ 0.59 *  |
| Vessels of diameter between 3 and 6 ( $\mu$ m) (x 10 <sup>5</sup> ) <sup>a</sup> | 0.16 $\pm$ 0.06    | 0.15 $\pm$ 0.09    |
| Vessels of diameter > 6 ( $\mu$ m) <sup>a</sup>                                  | 32.81 $\pm$ 0.0001 | 73.36 $\pm$ 0.0001 |
| Branching Nodes (x 10 <sup>4</sup> ) <sup>a</sup>                                | 22.39 $\pm$ 4.28   | 30.43 $\pm$ 2.51   |
| Blind-ends/sprouts (x 10 <sup>4</sup> ) <sup>a</sup>                             | 6.06 $\pm$ 0.92    | 7.93 $\pm$ 1.2     |
| Branching nodes <sup>b</sup>                                                     | 77.38 $\pm$ 9.59   | 87.31 $\pm$ 2.14   |
| Blind-ends/sprouts <sup>b</sup>                                                  | 24.09 $\pm$ 4.07   | 25.9 $\pm$ 1.66    |

### SMA-related metrics

|                                                  |                  |                 |
|--------------------------------------------------|------------------|-----------------|
| Vessels covered with SMA (%)                     | 47.2 $\pm$ 17.67 | 53.54 $\pm$ 12  |
| SMA <sup>+</sup> layer thickness ( $\mu$ m)      | 2.98 $\pm$ 0.76  | 2.72 $\pm$ 0.43 |
| Damage index                                     | 0.21 $\pm$ 0.11  | 0.19 $\pm$ 0.09 |
| Myofibroblasts (x 10 <sup>4</sup> ) <sup>a</sup> | 2.51 $\pm$ 1.18  | 2.05 $\pm$ 0.64 |
| Myofibroblasts <sup>b</sup>                      | 8.9 $\pm$ 3.8    | 5.97 $\pm$ 1.47 |
| Myofibroblasts (x 10 <sup>5</sup> ) <sup>d</sup> | 19.1 $\pm$ 10    | 15.3 $\pm$ 4.7  |

|                                                           |              |              |
|-----------------------------------------------------------|--------------|--------------|
| SMA+ perivascular cells (x 10 <sup>4</sup> ) <sup>a</sup> | 4.74 ± 2.36  | 5.25 ± 1.59  |
| SMA+ perivascular cells <sup>b</sup>                      | 16.16 ± 7.31 | 15.48 ± 3.65 |
| SMA+ perivascular cells (x 10 <sup>5</sup> ) <sup>d</sup> | 36.3 ± 19.3  | 38.9 ± 10.8  |

#### Efficiency in oxygen diffusion

|                                     |               |                 |
|-------------------------------------|---------------|-----------------|
| Maximal Extravascular Distance (µm) | 51.47 ± 10.83 | 45.47 ± 7.11    |
| Median Extravascular Distance (µm)  | 14.28 ± 2.64  | 13 ± 1.38       |
| Capillary Density <sup>c</sup>      | 1201 ± 298.12 | 1720 ± 368.61 * |
| Intercapillary Distance             | 8.09 ± 0.51   | 7.31 ± 0.27 *   |
| Diffusion Distance                  | 10.84 ± 0.51  | 9.76 ± 0.49 *   |

#### Additional cell-related metrics

|                                                     |              |              |
|-----------------------------------------------------|--------------|--------------|
| Endothelial cells (x 10 <sup>4</sup> ) <sup>a</sup> | 6.2 ± 1.05   | 7.91 ± 1.21  |
| Endothelial cells <sup>b</sup>                      | 22.45 ± 3.91 | 23.16 ± 1.34 |
| Endothelial cells (x 10 <sup>5</sup> ) <sup>d</sup> | 46.6 ± 8.1   | 58.8 ± 7.7 * |

930 **Table 3. Quantitative analysis of microvasculature parameters in infarcted cardiac**  
 931 **tissue from MT1-MMP<sup>ff</sup> and MT1-MMP<sup>ΔLysM</sup> mice on day 7 after MI.** Capillaries correspond  
 932 to CD31<sup>+</sup>SMA<sup>-</sup> vessels of diameter < 3 µm. Data are means ± SEM of 5-6 mice per genotype.  
 933 Unpaired *t*-test. Significant differences are indicated as \* *p* < 0.05. <sup>a</sup> per mm<sup>3</sup> of tissue, <sup>b</sup> per  
 934 mm vessel length, <sup>c</sup> per mm<sup>2</sup> of tissue, <sup>d</sup> per mm<sup>3</sup> vessel volume.



935 **FIGURES AND FIGURE LEGENDS**

936 **Figure 1. M $\phi$ -restricted MT1-MMP deficiency attenuates LV dysfunction and dilation and**  
937 **reduces collagen deposition after MI.** (A) mRNA expression levels of genes related to ECM-  
938 remodeling assessed by qPCR in sorted M $\phi$ s at the indicated post-MI stages. Data are means  
939  $\pm$  SEM of 3 independent pools of 3-5 mice per time point. One-way ANOVA followed by  
940 Tukey's multiple comparisons test. (B) Representative LV M-mode long-axis  
941 echocardiography views at end-diastole on day 0 and day 28 post-MI in MT1-MMP<sup>ff</sup> and MT1-  
942 MMP $\Delta$ Lys<sup>M</sup> mice. (C, D) Post-MI progression of LVEF and LVVold (C) and infarct size  
943 (percentage of LV with contractility alterations) and WMSI (D) assessed by echocardiography.  
944 Data are means  $\pm$  SEM of 9-10 mice per genotype. Two-way ANOVA followed by Tukey's  
945 multiple comparisons test. (E) Quantitative assessment of LV contractility at 28 days post-MI,  
946 showing mean scores for every LV segment at the basal, medial, and apical levels throughout  
947 all samples. L, lateral; A, anterior; P, posterior; S, septal. Segment scores are colored-coded  
948 from green to red: green = normal, yellow = hypokinesia, orange = akinesia, and red =  
949 dyskinesia or aneurysm. (F) Representative SHG (white) and MPEF (green) microscopy  
950 images of transverse cardiac sections at 28 days post-MI. Scale bar, 500  $\mu$ m. Magnified views  
951 of boxed areas within the infarct are shown in the lower panels. Scale bar, 100  $\mu$ m. Asterisks  
952 mark the epicardium. (G) Percentage SHG, skewness, and kurtosis in infarcts at 28 days post-  
953 MI. Data are means  $\pm$  SEM of 5-7 mice per genotype. Unpaired *t*-test.

954 **Figure 2. MT1-MMP $\Delta$ Lys<sup>M</sup> mice have a preserved microvasculature network and better**  
955 **myocardial oxygenation after ischemic injury.** (A) Representative confocal microscopy  
956 images showing immunostaining for CD31 (green) and nuclei (blue) within the infarction in  
957 MT1-MMP<sup>ff</sup> and MT1-MMP $\Delta$ Lys<sup>M</sup> hearts at 7 days post-MI. Scale bar, 50  $\mu$ m. (B) Vasculature-  
958 related parameters within the infarction at 7 days post-MI. Data are means  $\pm$  SEM of 5-6 mice  
959 per genotype. Unpaired *t*-test. (C) Representative confocal immunofluorescence microscopy  
960 images of CA-IX (red) in the infarcted region of MT1-MMP<sup>ff</sup> and MT1-MMP $\Delta$ Lys<sup>M</sup> hearts at 7  
961 days post-MI. Nuclei are stained with DAPI (blue). Scale bar, 100  $\mu$ m. (D) CA-IX<sup>+</sup> area:total  
962 area ratio in the infarcted zone. Data are means  $\pm$  SEM of 7-8 mice per genotype. Unpaired *t*-  
963 test.

964 **Figure 3. M $\phi$ -deletion of MT1-MMP impairs active TGF $\beta$ 1 release from LAP-TGF $\beta$ 1**  
965 **complex.** (A) Scheme of LAP-TGF $\beta$ 1 complex retention in the cell surface through LAP-  
966 binding to membrane receptors. (B) Representative flow cytometry histogram plots of LAP and  
967 TGF $\beta$ 1 staining in LPS-activated MT1-MMP<sup>ff</sup> and MT1-MMP $\Delta$ Lys<sup>M</sup> BMDMs. (C) Standardized  
968 mean fluorescence intensity (MFI) of LAP and TGF $\beta$ 1 in experiments as in B. Data are means  
969  $\pm$  SEM of 7 mice per group. Unpaired *t*-test. (D) Western blot of transferrin receptor (TfR),  $\alpha$ -

970 tubulin, and LAP-TGF $\beta$ 1 complex in membrane fraction (Mb), cytosolic fraction (C), and total  
971 lysate (T) from LPS-activated MT1-MMP<sup>fl/fl</sup> and MT1-MMP $\Delta$ Lys<sup>M</sup> BMDMs. (E) Quantification of  
972 LAP-TGF $\beta$ 1 complex in the membrane fraction. Data are means  $\pm$  SEM of 6-7 mice per  
973 genotype. Unpaired *t*-test. (F) *Tgfb1* mRNA expression in LPS-activated MT1-MMP<sup>fl/fl</sup> and  
974 MT1-MMP $\Delta$ Lys<sup>M</sup> BMDMs. Data are means  $\pm$  SEM of 5 mice per genotype. Unpaired *t*-test. (G)  
975 Arbitrary luciferase units (ALU) in HEK293 cells co-cultured with or without LPS-activated  
976 MT1-MMP<sup>fl/fl</sup> or MT1-MMP $\Delta$ Lys<sup>M</sup> BMDMs. Control corresponds to transfected HEK293 cells  
977 cultured alone. Data are means  $\pm$  SEM of a representative experiment of three performed with  
978 four technical replicates per condition. One-way ANOVA followed by Tukey's multiple  
979 comparisons test. (G) ALU in HEK293 cells co-cultured with or without conditioned media from  
980 LPS-activated MT1-MMP $\Delta$ Lys<sup>M</sup> BMDMs transduced with mock lentivirus (GFP), or lentivirus  
981 containing full-length MT1-MMP (FL) or catalytic MT1-MMP mutant (E240A). Control  
982 corresponds to transfected HEK293 cells cultured alone. Data are means  $\pm$  SEM of a  
983 representative experiment of three performed with three technical replicates per condition.  
984 One-way ANOVA followed by Tukey's multiple comparisons test.

985 **Figure 4. The absence of M $\phi$  MT1-MMP reduces TGF $\beta$ 1-pSMAD2 signaling in cardiac**  
986 **ECs, MyoFBs, and VSMCs after MI.** (A) Gating strategy used to assess pSMAD2 signaling  
987 in ECs, MyoFBs/VSMCs, and M $\phi$ s. (B) Representative flow cytometry histogram plots of  
988 pSMAD2 staining in the indicated cells from 7-day-post-MI hearts. (C) Standardized MFI of  
989 pSMAD2 in experiments as in B. Data are means  $\pm$  SEM of 7-8 mice per genotype. Unpaired  
990 *t*-test. (D) Representative immunofluorescence staining of CD31 (green), SMA (red), and  
991 pSMAD2 (white) in infarcted cardiac tissue from MT1-MMP<sup>fl/fl</sup> mice (top) and MT1-MMP $\Delta$ Lys<sup>M</sup>  
992 mice (bottom) at 7 days post-MI. Nuclei are stained with DAPI (blue). Red and yellow  
993 arrowheads point to pSMAD2<sup>+</sup> MyoFBs and pSMAD2<sup>+</sup> VSMCs, respectively. Scale bar, 50  
994  $\mu$ m. (E) Percentages of pSMAD2<sup>+</sup> MyoFBs and pSMAD2<sup>+</sup> VSMCs within the total MyoFB or  
995 VSMC populations, respectively in the infarcted zone. Data are means  $\pm$  SEM of 6 mice per  
996 genotype. Unpaired *t*-test.

997 **Figure 5. The absence of M $\phi$  MT1-MMP alters myocardial cellular composition after MI.**  
998 (A) Flow cytometry gating strategy used to identify and quantify cardiac ECs, MyoFBs, cells  
999 undergoing EndMT, and M $\phi$ s in MT1-MMP<sup>fl/fl</sup> mice (left) and MT1-MMP $\Delta$ Lys<sup>M</sup> mice (right) on day  
1000 7 after MI. (B) Quantification of M $\phi$ s, ECs, MyoFBs, and cells undergoing EndMT in cardiac  
1001 tissue 7 days after MI. Data are means  $\pm$  SEM of at least 11 mice per genotype. Unpaired *t*-  
1002 test.

1003 **Figure 6. Cardiac M $\phi$ s induce post-MI EndMT through MT1-MMP-mediated TGF $\beta$ 1**  
1004 **activation.** (A) Standardized MFI of LAP and TGF $\beta$ 1 staining in MT1-MMP<sup>fl/fl</sup> and MT1-  
1005 MMP $\Delta$ Lys<sup>M</sup> cardiac M $\phi$ s on day 7 after MI. Data are means  $\pm$  SEM of 6-7 mice per group.

1006 Unpaired *t*-test. (B) Luciferase activity (ALU) in transfected HEK293 cells co-cultured with M $\phi$ s  
1007 from 7-day-post-MI MT1-MMP<sup>ff</sup> or MT1-MMP $\Delta$ LysM hearts. Data are means  $\pm$  SEM of three  
1008 independent experiments performed with four technical replicates per condition. One-way  
1009 ANOVA followed by Tukey's multiple comparisons test. (C) Representative  
1010 immunofluorescence staining of CD31 (green) and SMA (red) in *in vitro* co-cultures of MAECs  
1011 and cardiac M $\phi$ s from MT1-MMP<sup>ff</sup> or MT1-MMP $\Delta$ LysM 7-day-post-MI hearts. Nuclei are stained  
1012 with DAPI (blue). Scale bar, 100  $\mu$ m (D) CD31<sup>+</sup> area ( $\mu$ m<sup>2</sup>) and SMA<sup>+</sup> area ( $\mu$ m<sup>2</sup>) in the different  
1013 conditions. Data are means  $\pm$  SEM of a representative experiment of three performed with  
1014 three technical replicates per condition. Unpaired *t*-test.

1015 **Figure 7. M $\phi$ -deletion of MT1-MMP preserves cardiac function after MI by impairing**  
1016 **TGF $\beta$ 1-mediated EndMT.** MI triggers MT1-MMP production by M $\phi$ s, contributing to release  
1017 of active TGF $\beta$ 1 from SLC (LAP-TGF $\beta$ 1) to the myocardium. Active TGF $\beta$ 1 signals acting on  
1018 ECs promote EndMT, contributing to adverse tissue remodeling. When M $\phi$  MT1-MMP is  
1019 absent, latent TGF $\beta$ 1 accumulates, and the availability of active TGF $\beta$ 1 in the myocardium  
1020 decreases. In this scenario, the impairment of M $\phi$ -mediated EndMT results in enhanced  
1021 angiogenesis and reduced fibrosis, limiting LV remodeling and preserving cardiac function.

1022 **Video 1.** Parasternal 2D long axis echocardiography view of MT1-MMP<sup>ff</sup> or MT1-MMP $\Delta$ LysM  
1023 hearts at baseline (Day 0) and at 28 days post-MI induced by LAD-ligation.

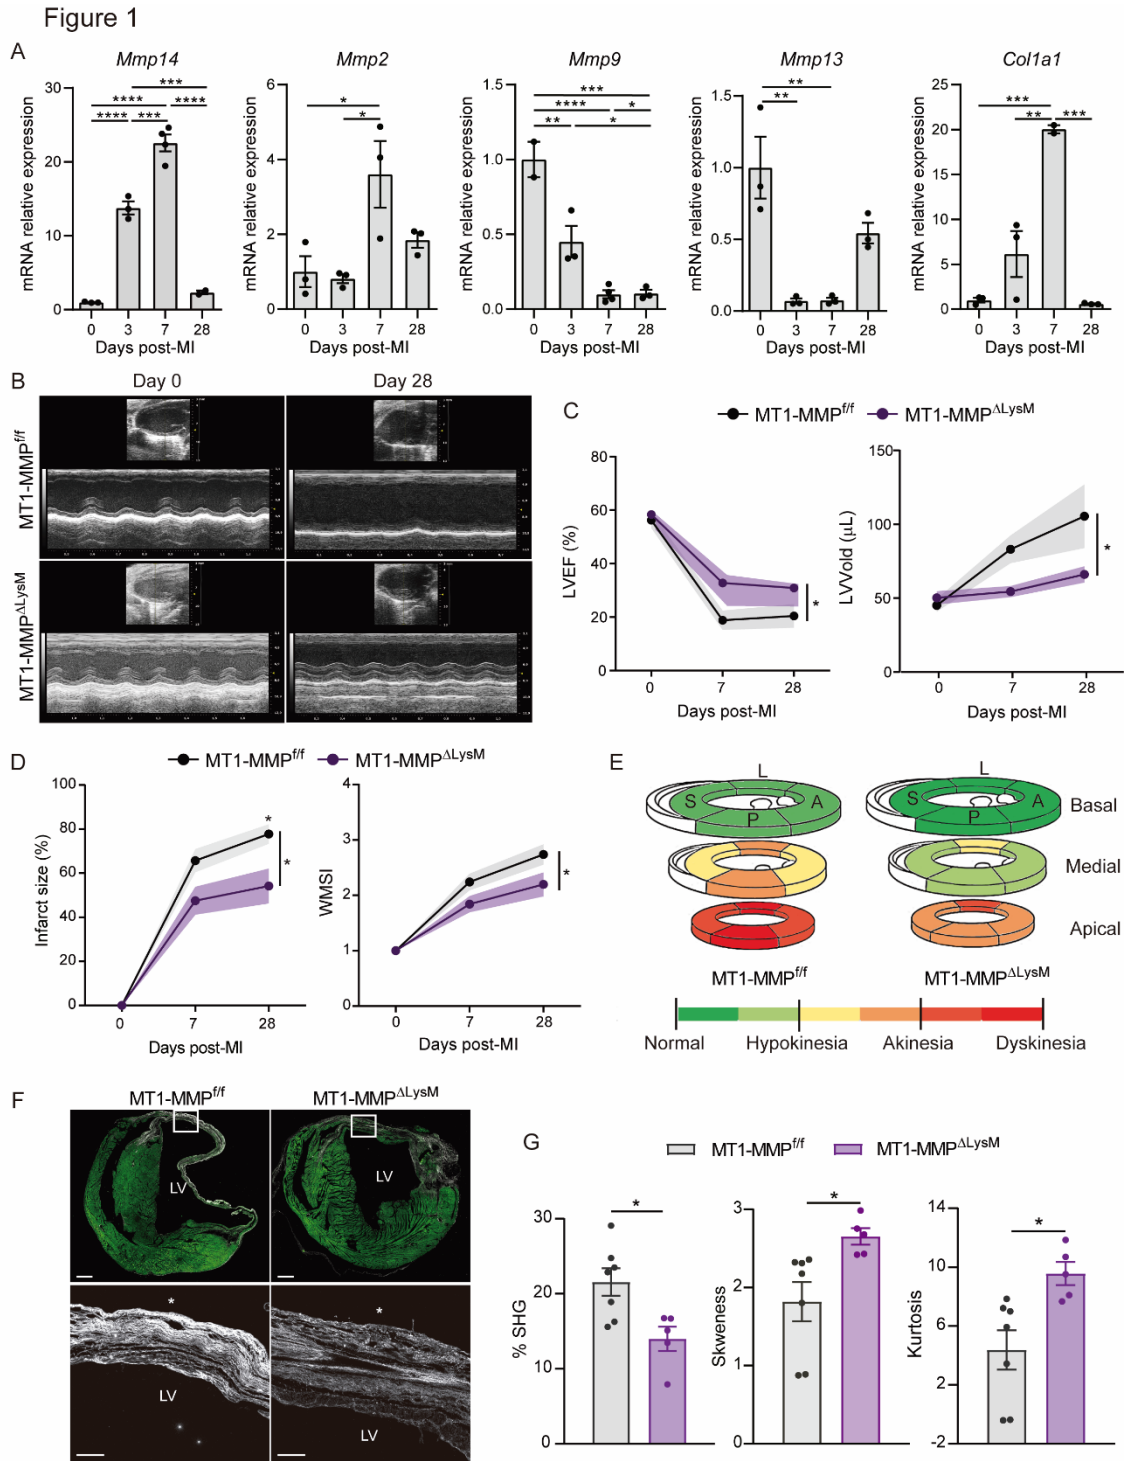

Figure 2

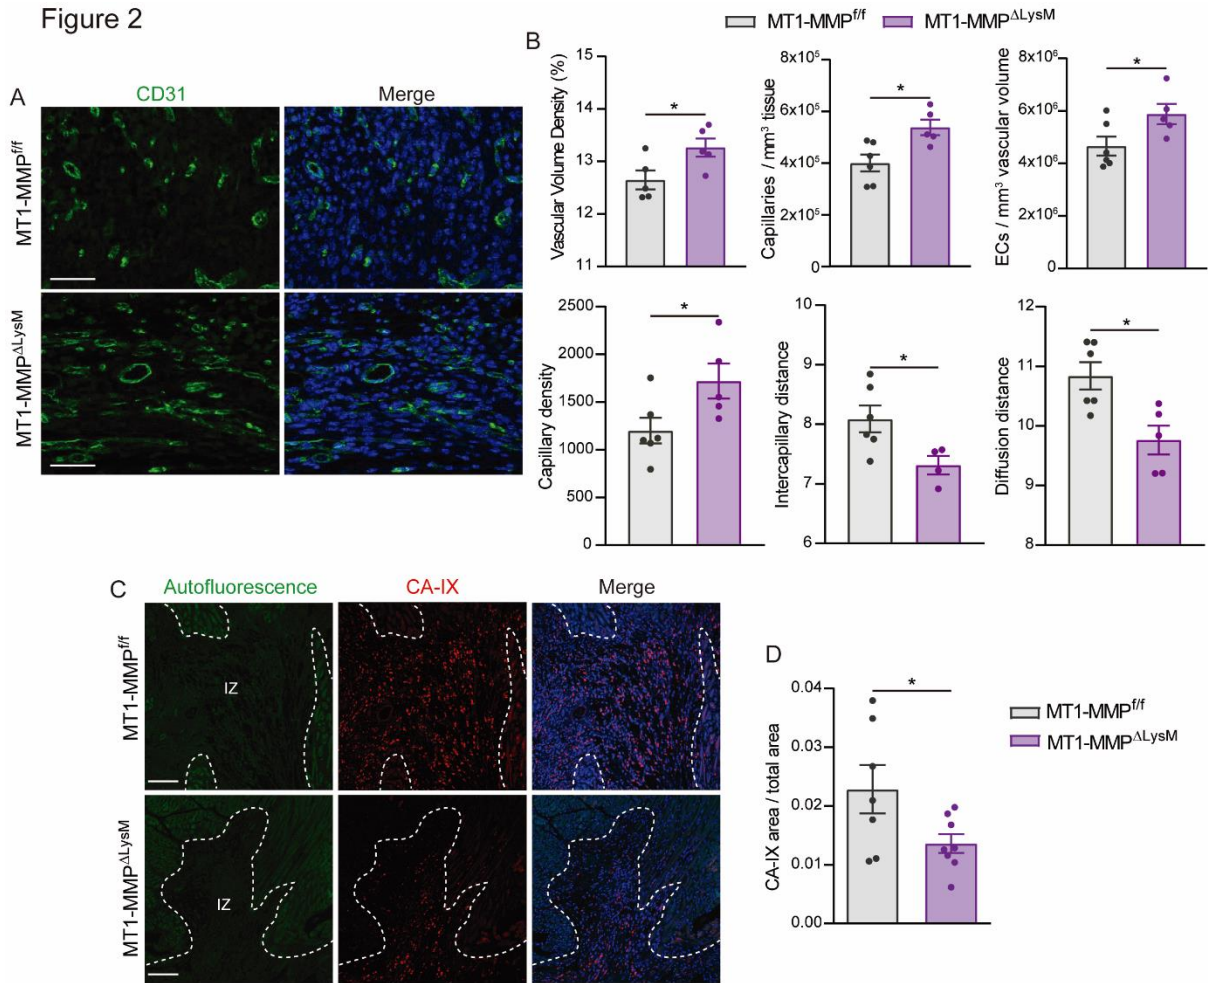

1025

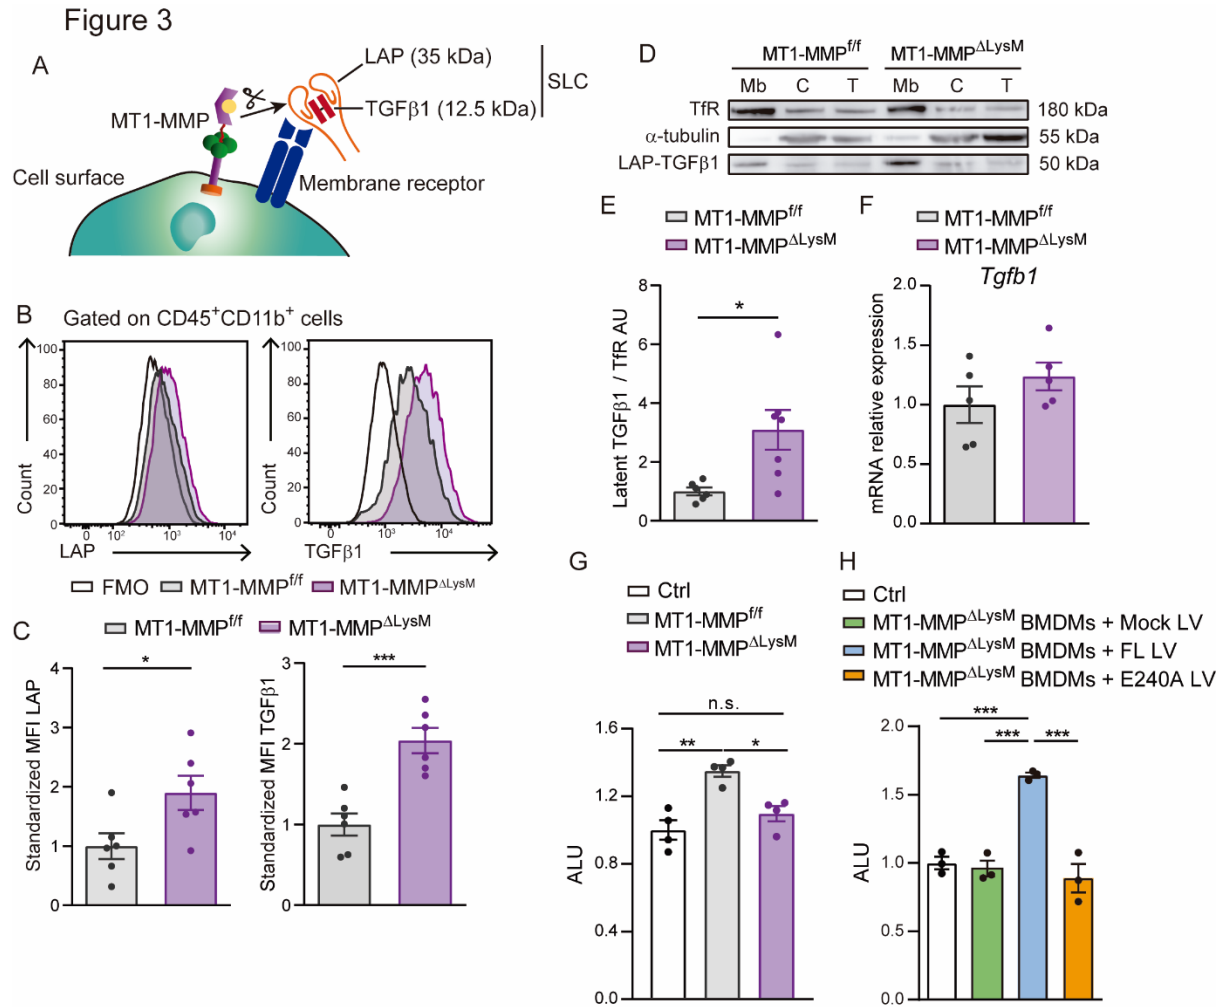

1026

Figure 4

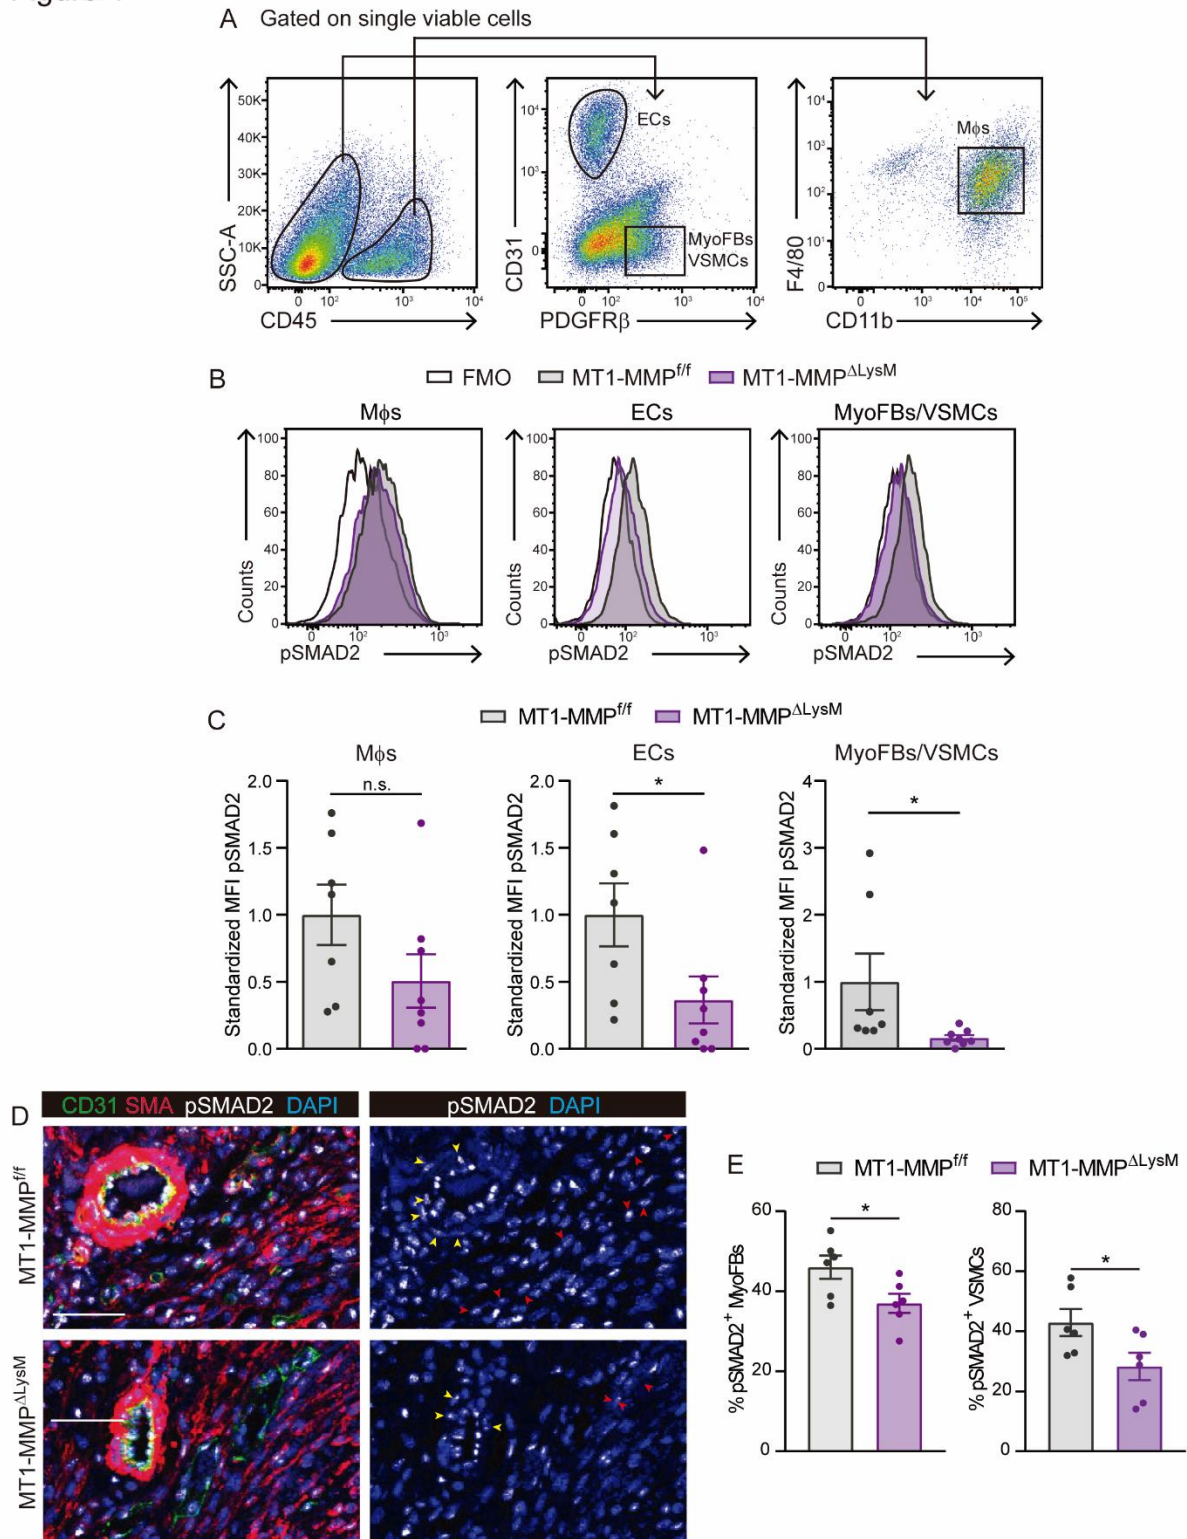

1027

Figure 5

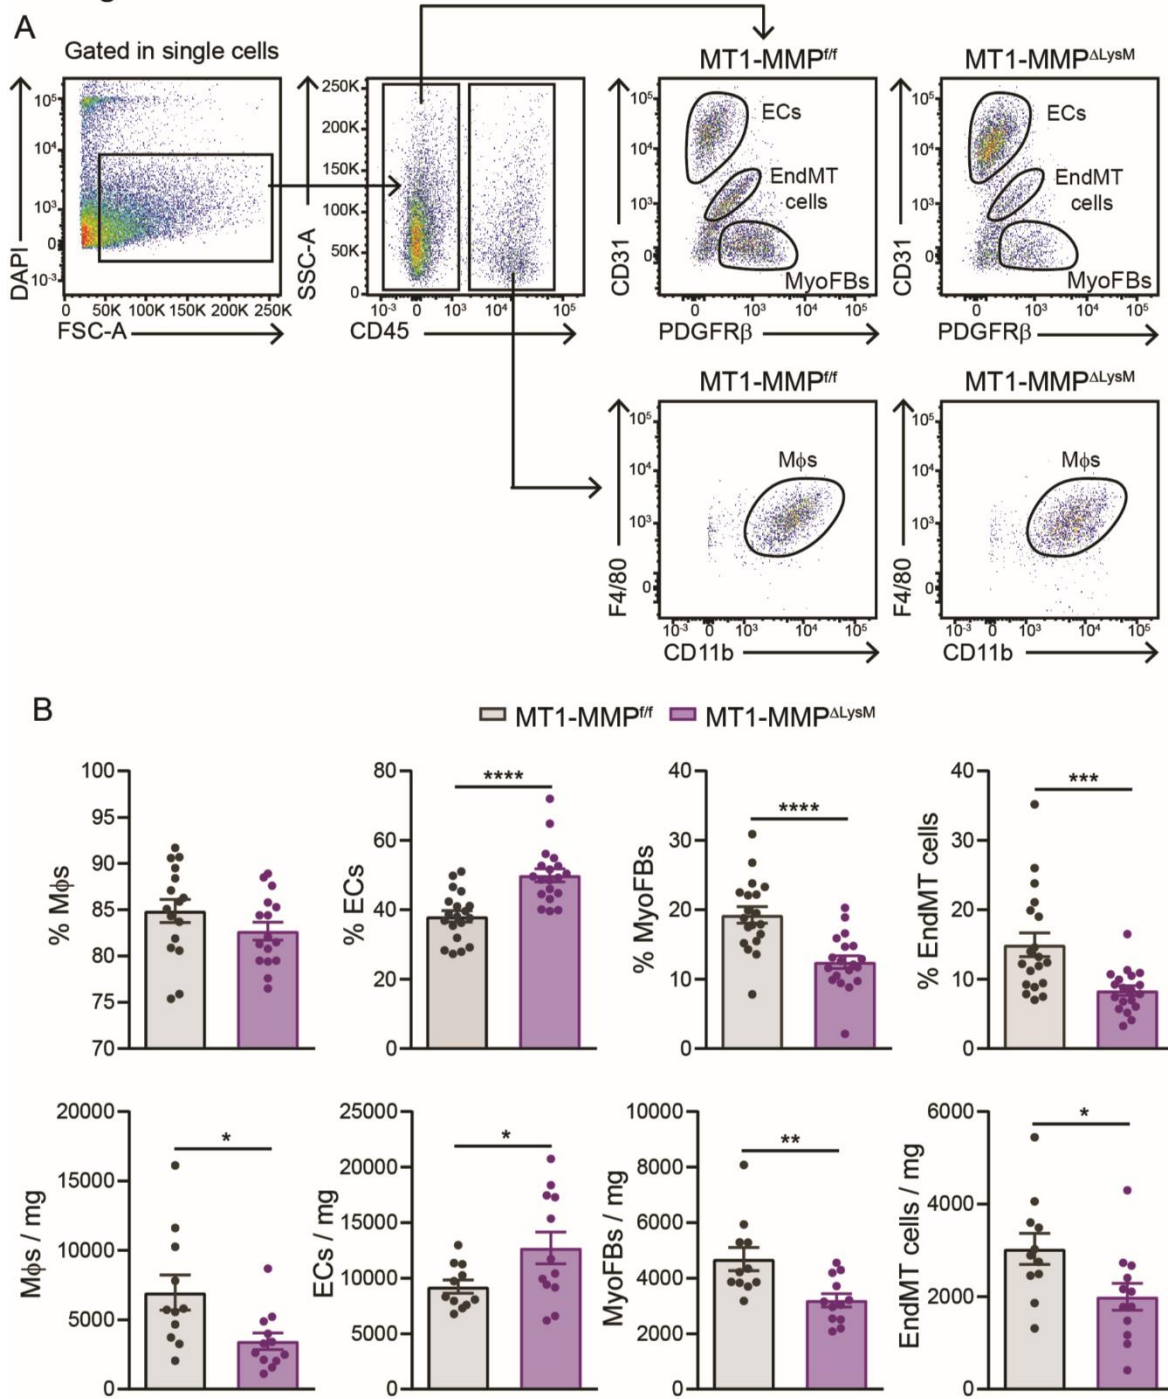

1028



Figure 6

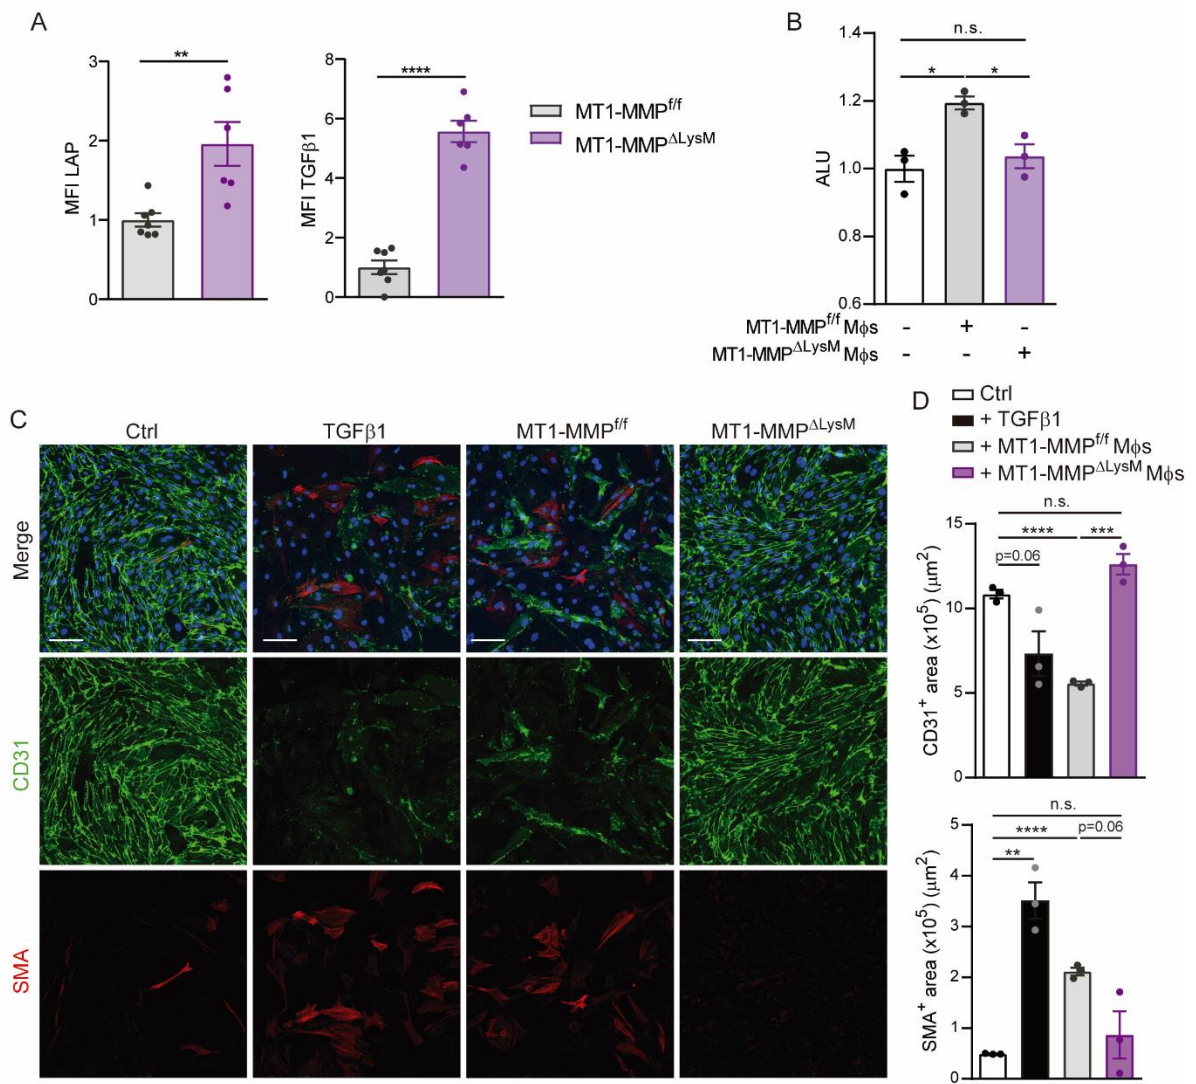

1029

Figure 7

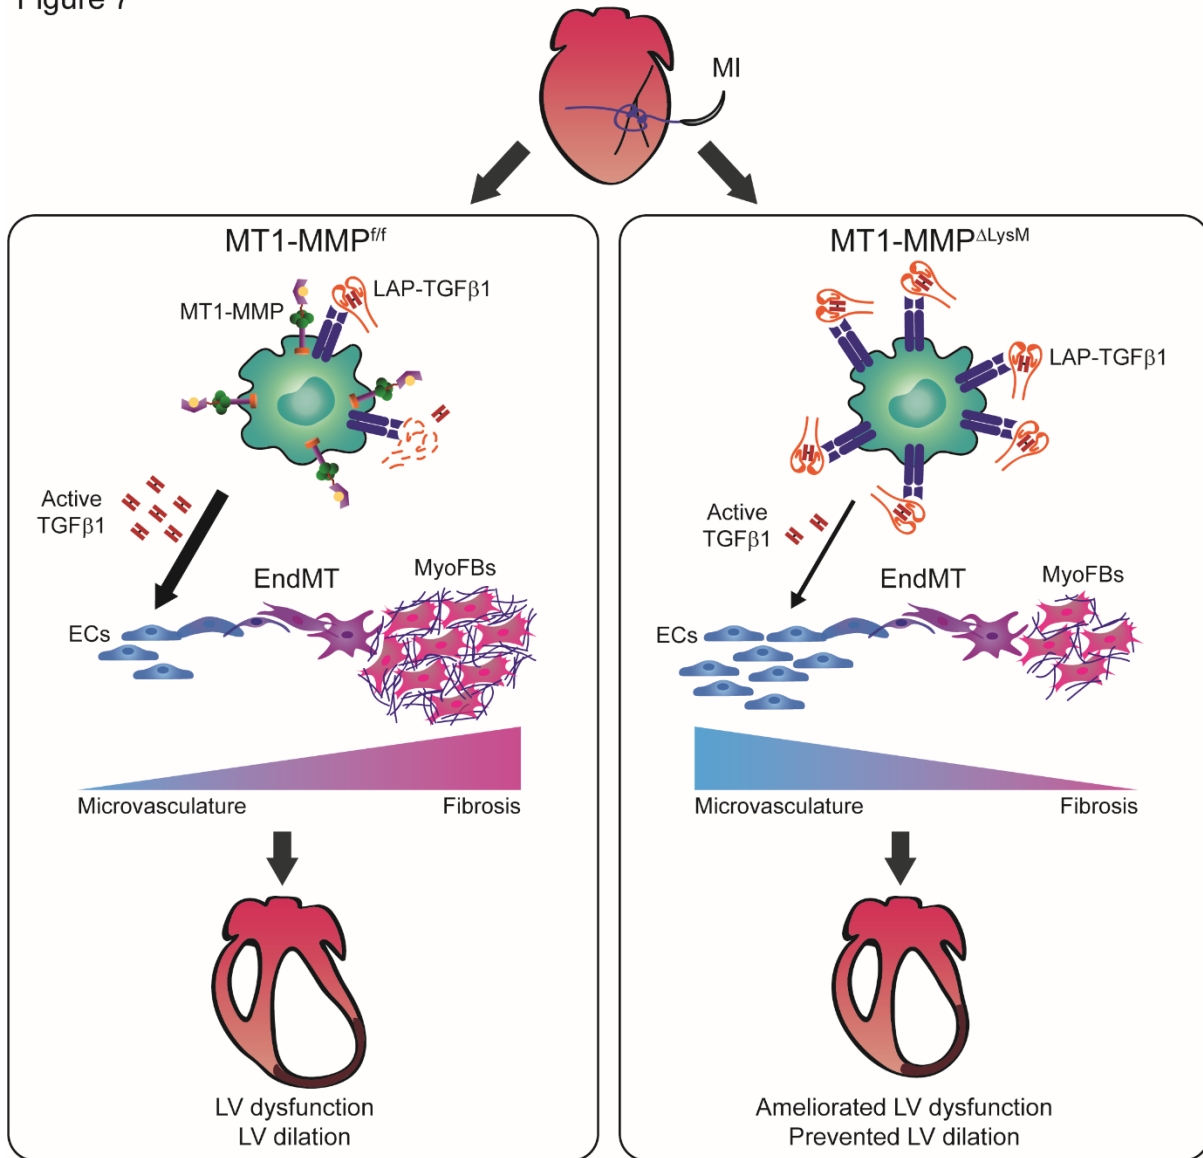

1030

## 1031 SUPPLEMENTAL FIGURES AND FIGURE LEGENDS

1032 **Figure 1- Figure supplement 1. Isolation of cardiac Mφs after MI.** (A) FACS gating strategy  
1033 to purify cardiac Mφs from C57BL/6 mice. (B) From the myeloid cell population (CD45<sup>+</sup>CD11b<sup>+</sup>  
1034 cells), F4/80<sup>+</sup>Ly6C<sup>low</sup> cells (blue) were isolated at 0, 7, and 28 days post-MI, and  
1035 F4/80<sup>+</sup>/Ly6C<sup>high</sup> cells (red) were purified at 3 days post-MI. Representative post-sort plots of  
1036 Mφs are shown in the lower panel. Sorting was performed with a pool of 3-5 mice per time  
1037 point.

1038 **Figure 1- Figure supplement 2. Mouse model of Mφ-specific MT1-MMP deletion.** (A)  
1039 Strategy for generating the transgenic mouse line used for Mφ deletion of *Mmp14*. LoxP sites  
1040 (red arrowheads) were introduced flanking exons 4 and 5, and a FRT-PGK-Neo-FRT-cassette  
1041 was inserted between exons 5 and 6 to generate the *Mmp14*<sup>fl/fl</sup> construct (top, right). To obtain  
1042 Mφ deletion of *Mmp14*, MT1-MMP<sup>fl/fl</sup> mice were crossed with LysM-Cre mice, yielding the  
1043 floxed *Mmp14* allele (bottom, right) in MT1-MMP<sup>ΔLysM</sup> mice. Green rectangles indicate  
1044 alignment position for genotyping primers. (B) Representative plots showing the gating  
1045 strategy for the identification of circulating monocytes (CD45<sup>+</sup>CD11b<sup>+</sup>Ly6G<sup>-</sup>CD115<sup>+</sup>Ly6C<sup>high</sup>  
1046 cells) and neutrophils (CD45<sup>+</sup>CD11b<sup>+</sup>Ly6G<sup>+</sup>CD115<sup>-</sup>Ly6C<sup>low</sup> cells) in peripheral blood from  
1047 MT1-MMP<sup>fl/fl</sup> and MT1-MMP<sup>ΔLysM</sup> mice. (C) Total numbers of baseline circulating monocytes  
1048 and neutrophils as depicted in B. Data are means ± SEM of 9-10 mice per genotype. (D) qPCR  
1049 analysis of *Mmp14* deletion efficiency in BMDMs and FACS-sorted 7-day-post-MI cardiac Mφs  
1050 (CD45<sup>+</sup>CD11b<sup>+</sup>F4/80<sup>+</sup>Ly6C<sup>low</sup> cells) and ECs (CD45<sup>-</sup>CD11b<sup>-</sup>CD31<sup>+</sup> cells) from MT1-MMP<sup>fl/fl</sup>  
1051 and MT1-MMP<sup>ΔLysM</sup> mice. Data are means ± SEM of 7 mice per genotype (for BMDMs) or 4-6  
1052 independent pools of 2 mice per genotype (for cardiac Mφs and cardiac ECs). Unpaired *t*-test.

1053 **Figure 1- Figure supplement 3. The absence of Mφ MT1-MMP ameliorates cardiac**  
1054 **dysfunction and reduces collagen deposition in a model of transient ischemia.** (A)  
1055 Progression of LVEF, LVIDs, and LVIDd in MT1-MMP<sup>fl/fl</sup> and MT1-MMP<sup>ΔLysM</sup> mice after  
1056 ischemia/reperfusion (I/R). Data are means ± SEM of 14 mice per genotype. Two-way ANOVA  
1057 followed by Tukey's multiple comparisons test. (B) Representative SHG (white) and MPEF  
1058 (green) microscopy images of transverse cardiac sections from MT1-MMP<sup>fl/fl</sup> and MT1-  
1059 MMP<sup>ΔLysM</sup> mice at 21 days after I/R. Scale bar, 1 mm. Magnified views of boxed areas in the  
1060 infarct are shown in the lower panels. Scale bar, 100 μm. (C) Percentage SHG, skewness,  
1061 and kurtosis in infarcts at 21 days post-I/R. Data are means ± SEM of 5-7 mice per genotype.  
1062 Unpaired *t*-test.

1063 **Figure 2- Figure supplement 1. Remodeling of cardiac vasculature in MT1-MMP<sup>ΔLysM</sup>**  
1064 **mice after MI.** (A) Representative confocal immunofluorescence microscopy images of CA-  
1065 IX (red) in MT1-MMP<sup>fl/fl</sup> and MT1-MMP<sup>ΔLysM</sup> hearts at 7 days post-MI in the remote zone (RZ).

1066 Nuclei are stained with DAPI (blue). Scale bar, 100  $\mu$ m. (B) CA-IX<sup>+</sup> area:total area ratio in the  
1067 RZ. Data are means  $\pm$  SEM of 7-8 mice per genotype. Unpaired *t*-test. (C) Representative  
1068 images of SMA-stained transverse sections of MT1-MMP<sup>ff</sup> and MT1-MMP $\Delta$ LysM hearts at 7  
1069 days post-MI. Scale bar, 1 mm. Magnified views of boxed areas in the infarct are shown on  
1070 the right. Scale bar, 100  $\mu$ m. (D) SMA<sup>+</sup> vessel density and SMA<sup>+</sup> vessel wall thickness in the  
1071 IZ at 7 days post-MI. Data are means  $\pm$  SEM of 5-7 per group. Unpaired *t*-test.

1072 **Figure 5- Figure supplement 1. Endothelial-to-mesenchymal gene signature of**  
1073 **CD31<sup>+</sup>PDGFR $\beta$ <sup>+</sup> cells.** (A) FACS gating strategy to purify cardiac ECs, EndMT cells, and  
1074 MyoFBs/VSMCs from 7 days post-MI WT hearts. Representative post-sort plots of M $\phi$ s are  
1075 shown in the lower panel. Sorting was performed with a pool of 2 mice per time point. (B)  
1076 qPCR analysis of ECs, EndMT cells, and MyoFBs/VSMCs for endothelial genes (*Pecam*,  
1077 *Cdh5*, *Kdr*, *Col4a1*, *Col4a2*) and fibroblast genes (*Cdh2*, *Tagln*, *Col1a1*, *Col1a2*, *Col3a1*), and  
1078 EndMT-mediating transcription factors (*Zeb2* and *Snai1*). Data are means  $\pm$  SEM of at least  
1079 three independent biological replicates per group. Two-way ANOVA followed by Tukey's  
1080 multiple comparisons test.

1081 **Figure 5- Figure supplement 2. Lineage tracing of endothelial derived-mesenchymal**  
1082 **cells.** (A-E) Representative flow cytometry plots showing expression of Tomato and PDGFR $\beta$   
1083 in CD45<sup>-</sup> cardiac cells in the indicated mice. (A) C57BL/6 FMO sample for PDGFR $\beta$ ; (B)  
1084 C57BL/6 sample stained with anti-PDGFR $\beta$  antibody; (C) VE-Cadh-Cre<sup>ERT2</sup> R26Tomato FMO  
1085 sample for PDGFR $\beta$ ; (D, E) Cdh5-Cre<sup>ERT2</sup> R26Tomato sample stained with anti-PDGFR $\beta$   
1086 antibody in control (D) or 7 day-post-MI hearts (E). Numbers indicate percentage of cells within  
1087 the CD45<sup>-</sup> cell population. Representative plots of n=2 hearts per condition.

1088 **Figure 5- Figure supplement 3. The absence of M $\phi$  MT1-MMP attenuates post-MI**  
1089 **EndMT.** (A) Complementary flow cytometry gating strategy used to identify and quantify  
1090 cardiac ECs, MyoFBs/VSMCs, and cells undergoing EndMT in MT1-MMP<sup>ff</sup> mice (left) and  
1091 MT1-MMP $\Delta$ LysM mice (right) on day 7 after MI. (B) Quantification of ECs, MyoFBs, and cells  
1092 undergoing EndMT in cardiac tissue 7 days after MI. Data are means  $\pm$  SEM of 7-8 mice per  
1093 genotype. Unpaired *t*-test. (C) Representative confocal immunofluorescence microscopy  
1094 images of pSMAD2 (green), SMA (red), ERG (white) and DAPI (blue) of the infarcted area of  
1095 MT1-MMP<sup>ff</sup> hearts at 7 days post-MI. Arrows indicate ERG<sup>+</sup>/SMA<sup>+</sup>/pSMAD2<sup>+</sup> cells, asterisks  
1096 indicate ERG<sup>+</sup>/SMA<sup>-</sup>/pSMAD2<sup>+</sup> cells, and arrowheads indicate ERG<sup>-</sup>/SMA<sup>+</sup>/pSMAD2<sup>+</sup> cells.  
1097 Scale bar, 50  $\mu$ m. (D) Triple positive cells named "a" and "b" are shown magnified with their  
1098 orthogonal views in the boxes to the right. Scale bar, 5  $\mu$ m.

1099 **Figure 6- Figure supplement 1. MT1-MMP is required for *in vitro* M $\phi$  induction of EndMT.**  
1100 (A) Representative immunofluorescence staining of CD31 (green) and SMA (red) in *in vitro*

1101 co-cultures of MAECs and LPS-activated MT1-MMP<sup>f/f</sup> or MT1-MMP<sup>ΔLysM</sup> BMDMs. Nuclei are  
1102 stained with DAPI (blue). MAECs were also treated with TGFβ1 (10 ng/ml) as an EndMT  
1103 positive control. Scale bar, 100 μm (B) CD31<sup>+</sup> area (μm<sup>2</sup>) and SMA<sup>+</sup> area (μm<sup>2</sup>) in the different  
1104 conditions. Data are means ± SEM of four independent experiments carried out with three  
1105 technical replicates per condition. Unpaired *t*-test. (C) qPCR analysis of endothelial and  
1106 myofibroblast markers and TGFβ1 target genes in *in vitro* co-cultures of MAECs and LPS-  
1107 activated MT1-MMP<sup>f/f</sup> or MT1-MMP<sup>ΔLysM</sup> BMDMs. Data are means ± SEM of a representative  
1108 experiment of two performed with three technical replicates per condition. Unpaired *t*-test.

Figure 1 - Figure Supplement 1

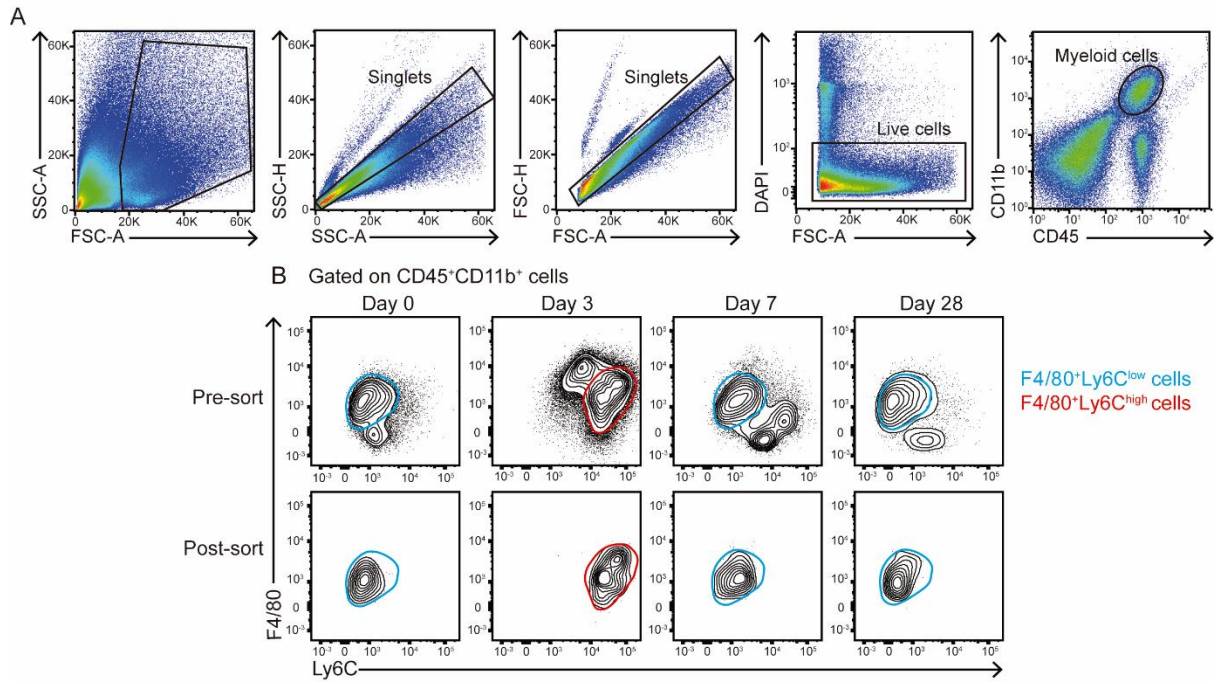

1109

Figure 1- Figure supplement 2

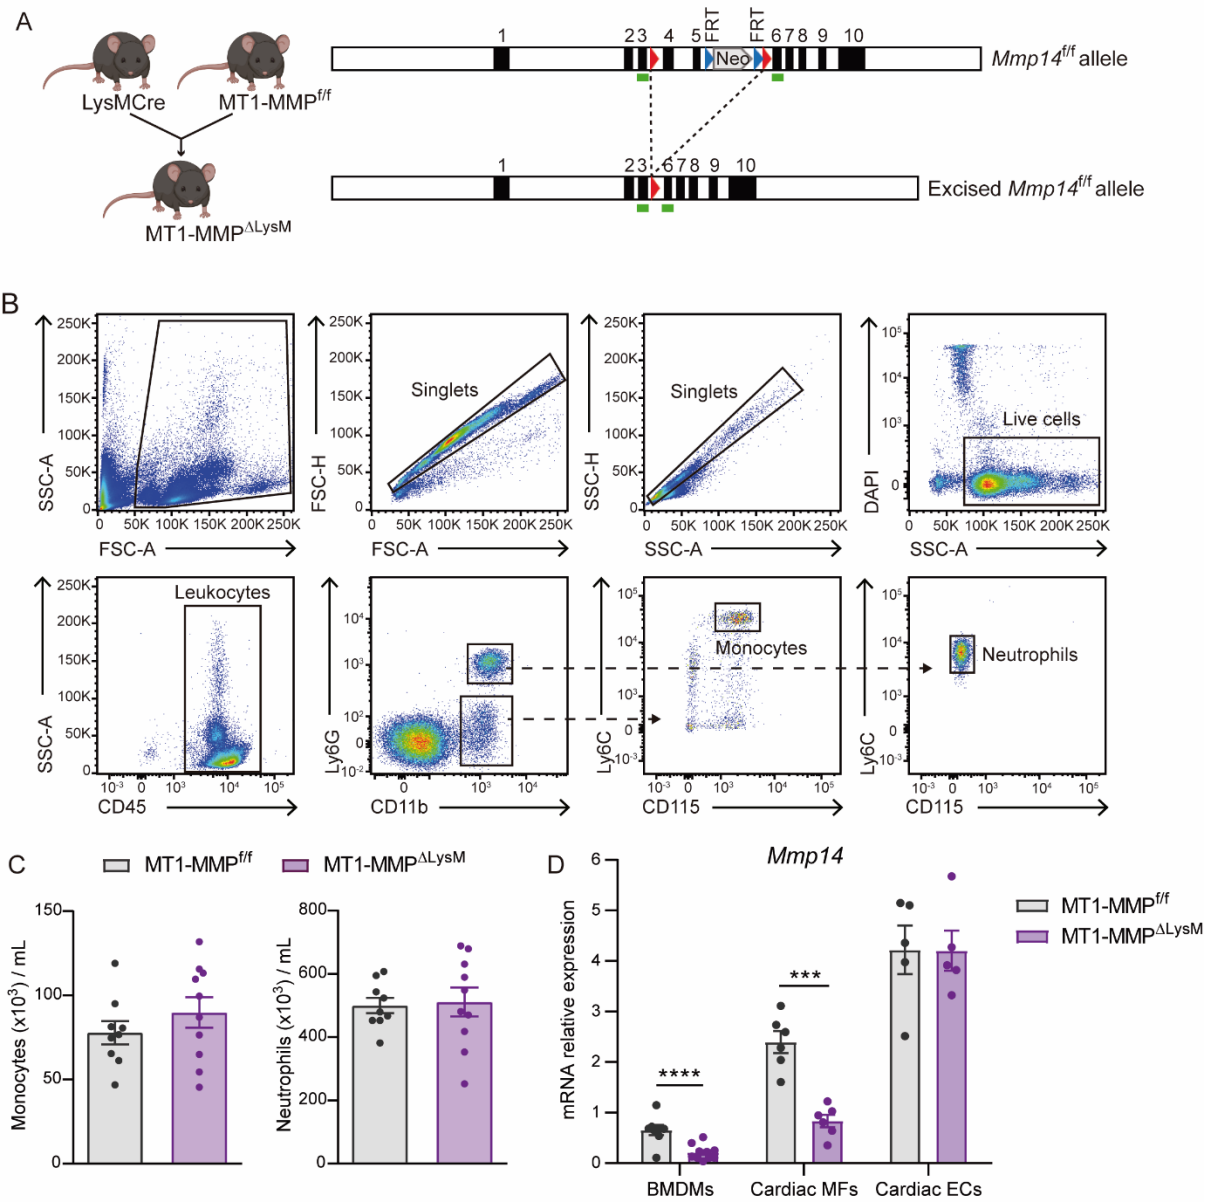

Figure 1- Figure supplement 3

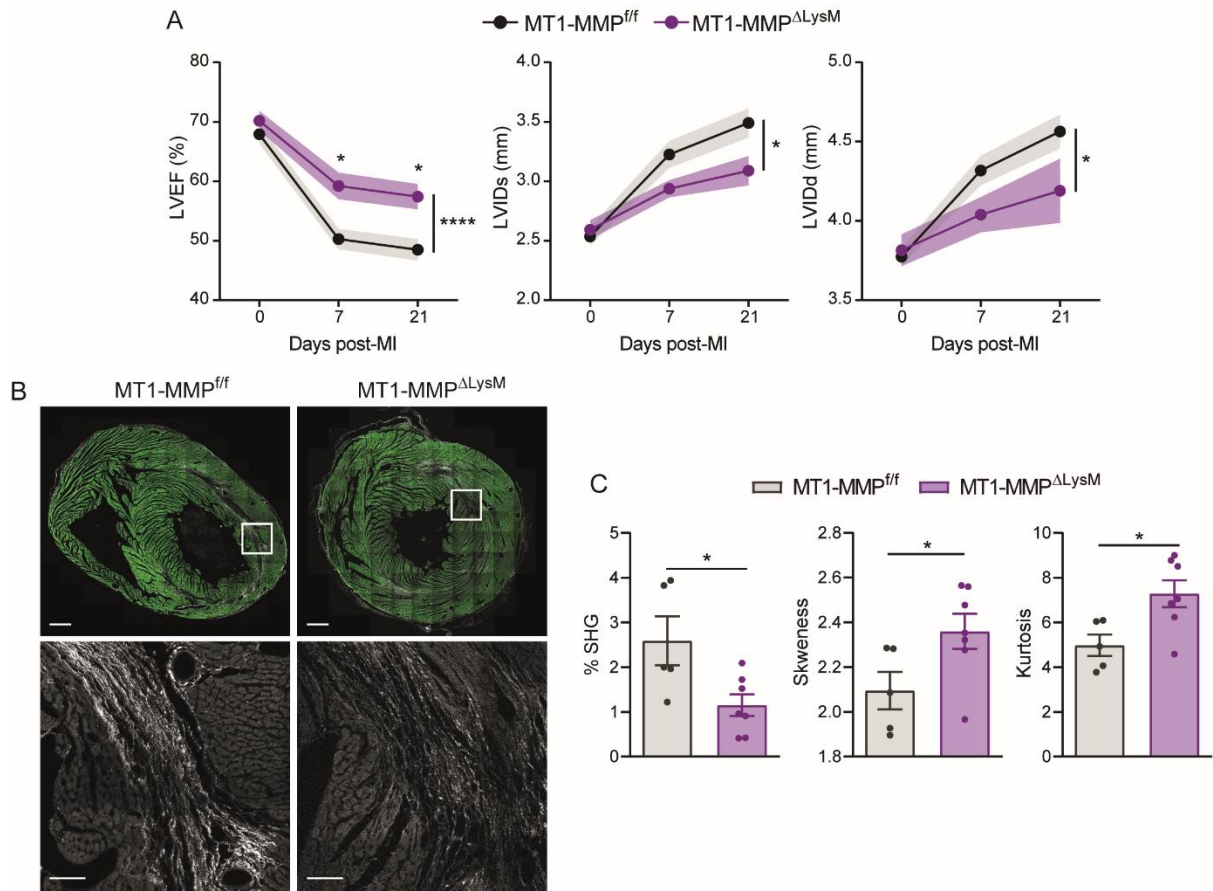

1111



Figure 2- Figure supplement 1

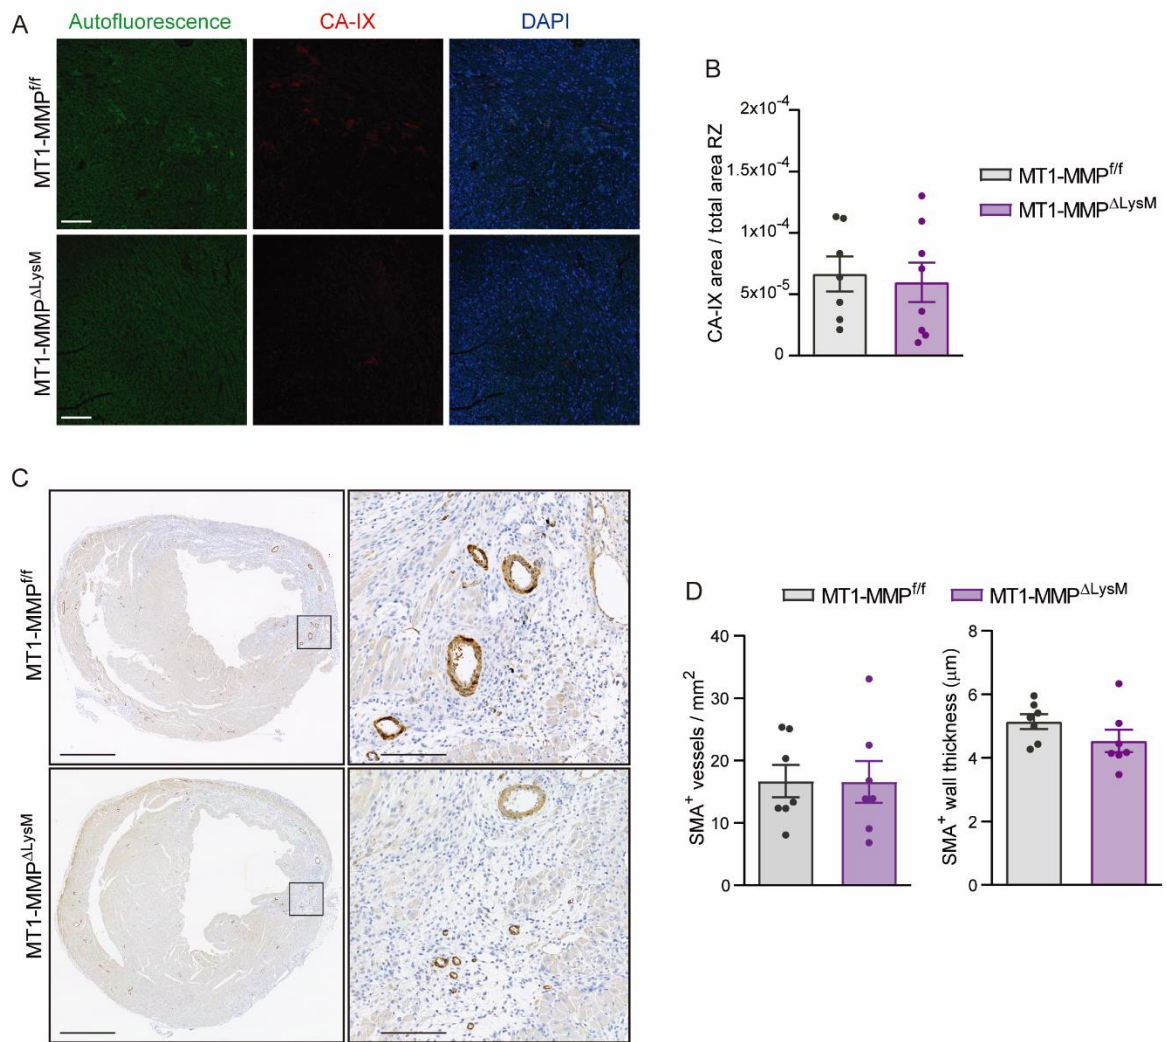

1112

Figure 5 - Figure supplement 1

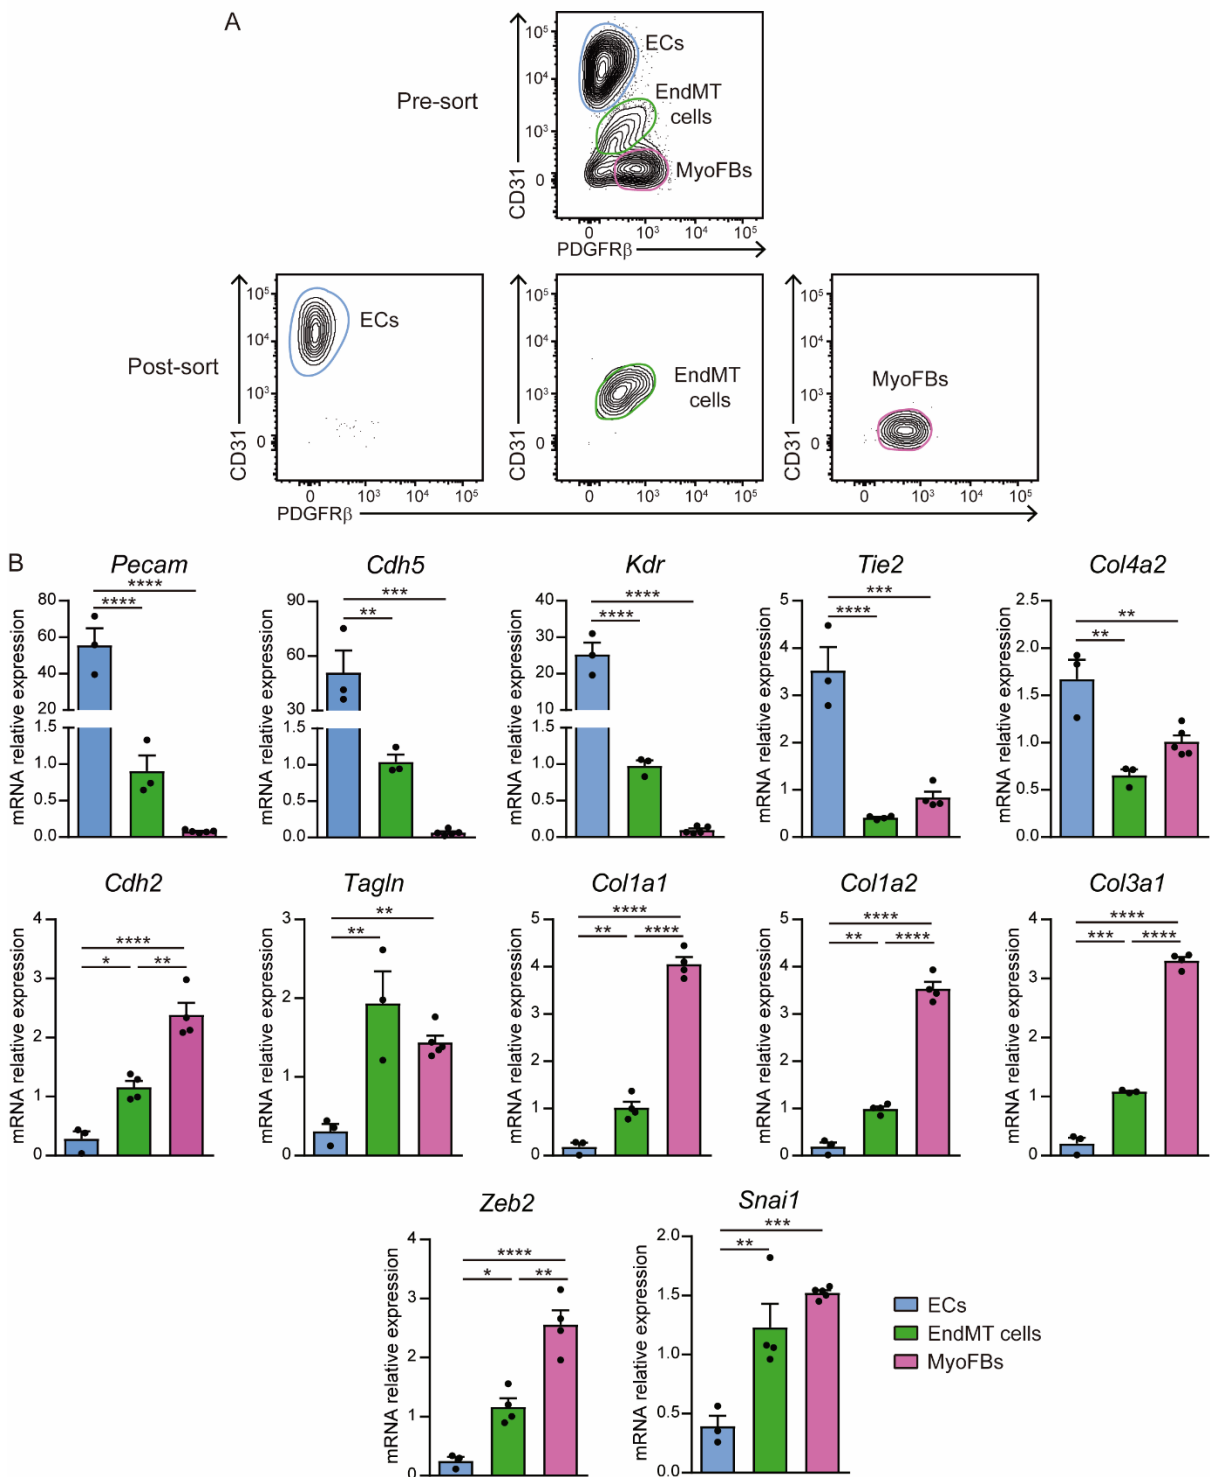

1113

Figure 5 - Figure Supplement 2

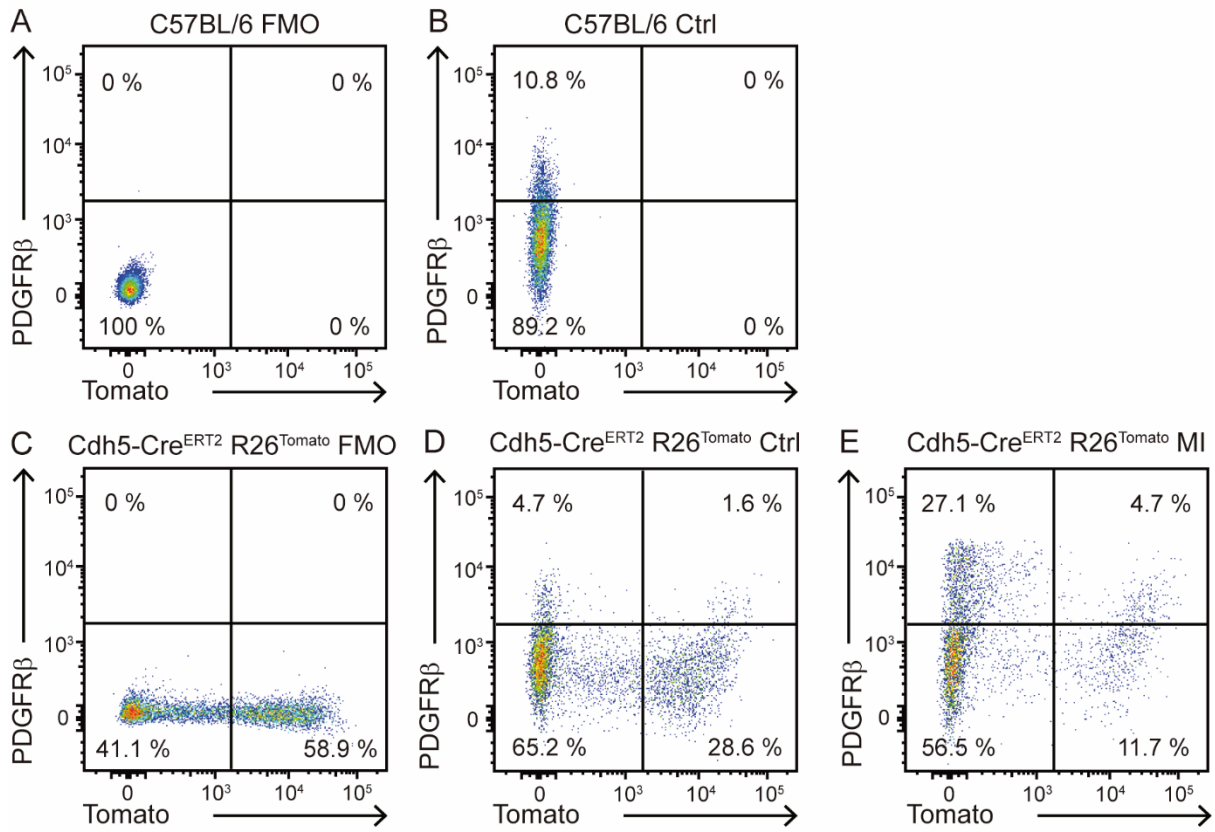

1114

Figure 5 - Figure Supplement 3

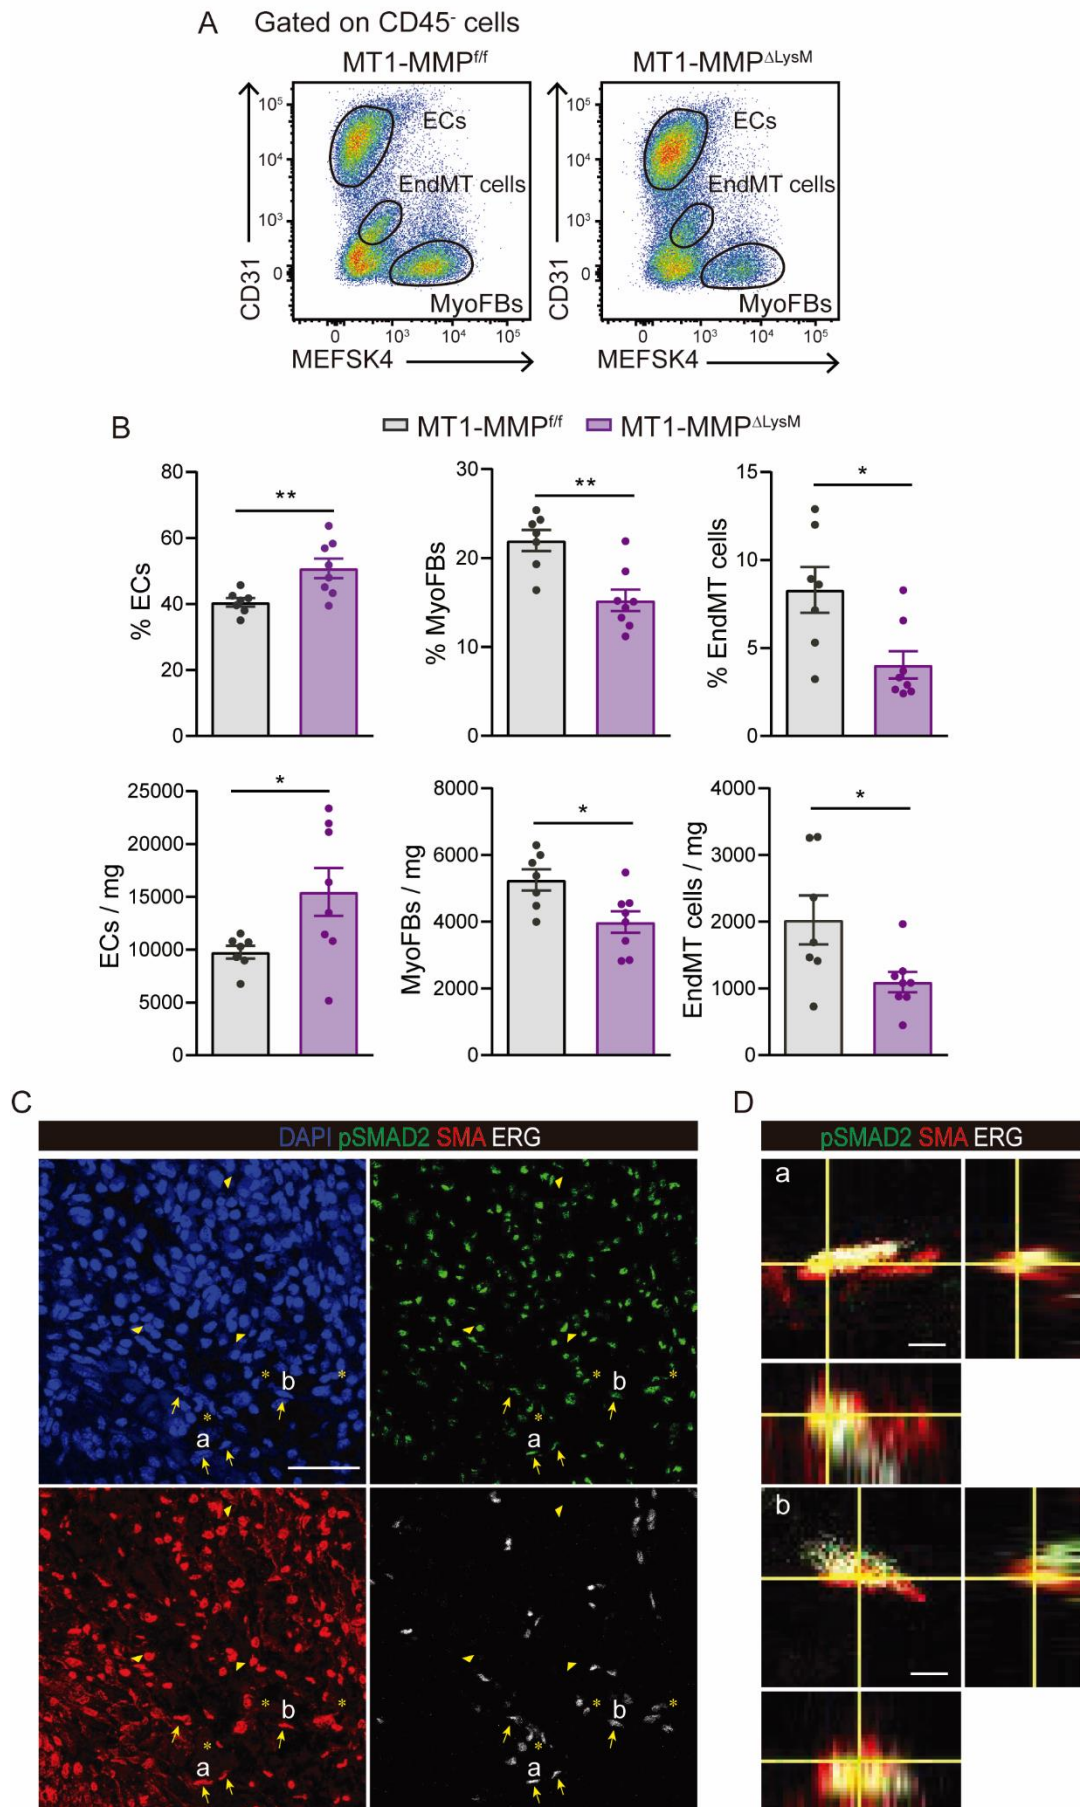

Figure 6 - Figure Supplement 1

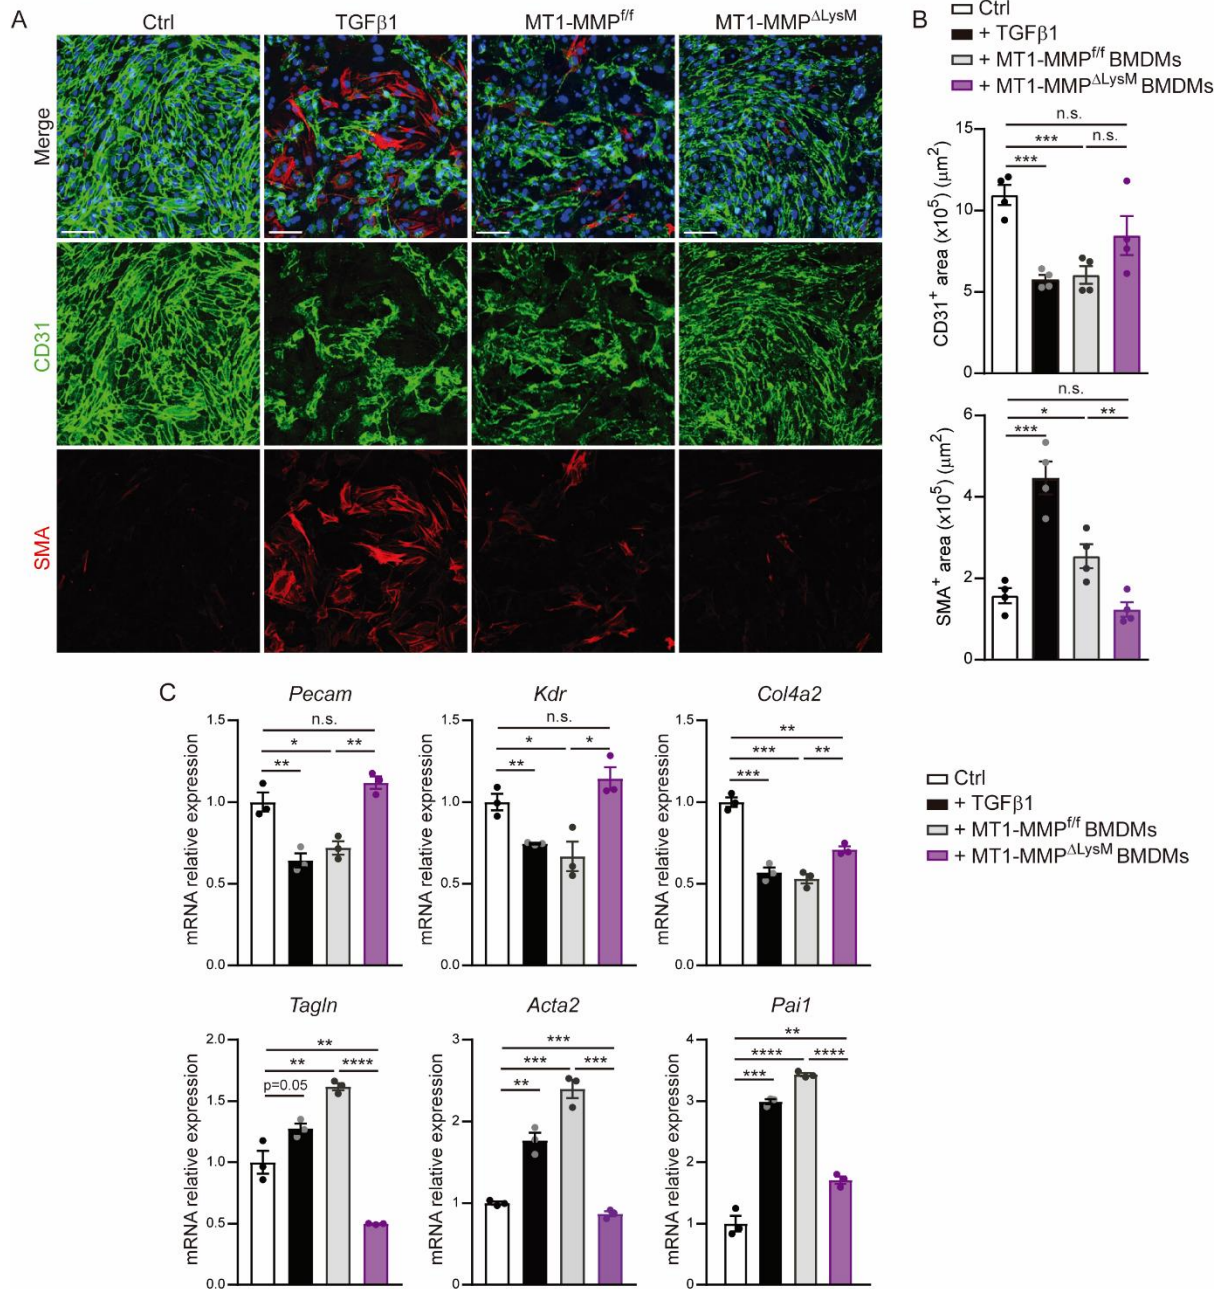

1116
